# Supplementary material for: Association between HTR2C gene variants and suicidal behaviour: a protocol for the systematic review and meta-analysis of genetic studies
Source: PubMed Central journal article supplement — BMJ Open. 2014 Sep 4;4(9):e005423. doi: 10.1136/bmjopen-2014-005423 (PMC4158196; doi:10.1136/bmjopen-2014-005423), 2014-09-04
Supplement: bmjopen-2014-005423.draft_revisions.pdf [file bmjopen-2014-005423.draft_revisions.pdf]

# BMJ Open

## Association between HTR2C gene variants and suicidal behavior: protocol for systematic review and meta-analysis of genetic studies

|                                 |                                                                                                                                                                                                                                                                                                                                                                                                                                                                                                                                                                                        |
|---------------------------------|----------------------------------------------------------------------------------------------------------------------------------------------------------------------------------------------------------------------------------------------------------------------------------------------------------------------------------------------------------------------------------------------------------------------------------------------------------------------------------------------------------------------------------------------------------------------------------------|
| Journal:                        | <i>BMJ Open</i>                                                                                                                                                                                                                                                                                                                                                                                                                                                                                                                                                                        |
| Manuscript ID:                  | bmjopen-2014-005423                                                                                                                                                                                                                                                                                                                                                                                                                                                                                                                                                                    |
| Article Type:                   | Protocol                                                                                                                                                                                                                                                                                                                                                                                                                                                                                                                                                                               |
| Date Submitted by the Author:   | 08-Apr-2014                                                                                                                                                                                                                                                                                                                                                                                                                                                                                                                                                                            |
| Complete List of Authors:       | González-Castro, Thelma; Universidad Juárez Autónoma de Tabasco, División Académica de Ciencias de la Salud Juárez-Rojop, Isela; Universidad Juárez Autónoma de Tabasco, División Académica de Ciencias de la Salud Genis-Mendoza, Alma; Instituto de Medicina Genómica (INMEGEN), Servicios de Atención Psiquiátrica (SAP), Secretaría de Salud López-Narváez, María; Hospital General de Yajalon, Secretaría de Salud Tovilla-Zárate, Carlos; Universidad Juárez Autónoma de Tabasco, División Multidisciplinaria de Comalcalco, División Académica Multidisciplinaria de Comalcalco |
| <b>Primary Subject Heading</b>: | Mental health                                                                                                                                                                                                                                                                                                                                                                                                                                                                                                                                                                          |
| Secondary Subject Heading:      | Public health                                                                                                                                                                                                                                                                                                                                                                                                                                                                                                                                                                          |
| Keywords:                       | Suicide & self-harm < PSYCHIATRY, MENTAL HEALTH, PSYCHIATRY                                                                                                                                                                                                                                                                                                                                                                                                                                                                                                                            |
|                                 |                                                                                                                                                                                                                                                                                                                                                                                                                                                                                                                                                                                        |

SCHOLARONE™  
Manuscripts

only

1  
2  
3 **Association between HTR2C gene variants and suicidal behavior: protocol**  
4 **for systematic review and meta-analysis of genetic studies.**  
5  
6  
7

8 González-Castro Thelma Beatriz<sup>1</sup>, Juárez-Rojop Isela<sup>1</sup>, Genis Alma<sup>2</sup>, López-  
9 Narváez María Lilia<sup>3</sup> Tovilla-Zárate Carlos Alfonso<sup>4</sup> \*

10  
11  
12 <sup>1</sup>Universidad Juárez Autónoma de Tabasco, División Académica de Ciencias de la  
13 Salud, Villahermosa, Tabasco, México.

14 <sup>2</sup> Instituto Nacional de Medicina Genómica (INMEGEN), Servicios de Atención  
15 Psiquiátrica (SAP), Secretaría de Salud. México, D. F., México.

16 <sup>3</sup> Hospital General de Yajalón. Secretaria de Salud, Yajalón, Chiapas, México.

17 <sup>4</sup> Universidad Juárez Autónoma de Tabasco, División Académica Multidisciplinaria  
18 de Comalcalco, Comalcalco, Tabasco, México.  
19  
20  
21  
22  
23  
24  
25

26 Email addresses:

27  
28 GCTB: thelma.glez.castro@gmail.com

29  
30 JRI: iselajua22@yahoo.com.mx

31  
32 GA: genis76@yahoo.com

33  
34 LNL: dralilialonar@yahoo.com.mx

35  
36 TZCA: alfonso\_tovillaz@yahoo.com.mx

37  
38 \*Corresponding author  
39  
40  
41

42 *\*Correspondence to: Dr. Carlos Alfonso Tovilla Zárate, Universidad Juárez*  
43 *Autónoma de Tabasco, División Académica Multidisciplinaria de Comalcalco,*  
44 *Ranchería Sur, Cuarta Sección, C.P. 86650, Comalcalco, Tabasco, México. Tel.*  
45 *52 9933581500 ext. 6901, e-mail: alfonso\_tovillaz@yahoo.com.mx*  
46  
47  
48  
49  
50  
51  
52  
53  
54  
55  
56  
57  
58  
59  
60

## Abstract

**Introduction:** Suicide is a significant public health issue and one of the most common causes of death throughout the world. Suicidal behavior is a complex and multi-factorial problem; case-control studies have reported an association between the serotonin system and suicidal behavior; recently, the 5-HT2C gen has been suggested as a probable cause.

**Methods and analysis:** To have a more comprehensive understanding of the role of these gene, a meta-analysis of 5-HT2C with an up-to-date data will be performed. This meta-analysis will follow the Preferred Reporting Items for Systematic Reviews and Meta-Analyses (PRISMA) criteria. Studies deemed for inclusion in the systematic review will scored for methodological quality using the Newcastle-Ottawa Assessment Scale (NOS). Also, to give more support to our analysis, we will take into consideration the GRADES scales procedures.

**Ethics and dissemination:** The study will describe the association between HTR2C gene and suicidal behavior. The results of this study will be disseminated by peer-reviewed publication and scientific presentations in Mexico and the world.

**Protocol registration:** PROSPERO CRD42014009213

1  
2  
3  
4  
5  
6  
7  
8 Strength and limitations of this study  
9  
10

- 11  
12 • This study could improve the understanding of the genetic component of  
13 suicidal behavior.  
14
- 15 • This study protocol could show evidence of the role that the 5-HTR2C gene  
16 plays in the suicidal behavior.  
17  
18
- 19 • A small sample or the presence of high heterogeneity could be a limitation.  
20  
21  
22  
23  
24  
25  
26  
27  
28  
29  
30  
31  
32  
33  
34  
35  
36  
37  
38  
39  
40  
41  
42  
43  
44  
45  
46  
47  
48  
49  
50  
51  
52  
53  
54  
55  
56  
57  
58  
59  
60

## Introduction

Suicide is best known as the act of taking one's own life voluntarily. But, the suicidal behavior includes a wide spectrum of actions that can be classified as follows: suicidal ideation (includes thoughts of ending life); attempted suicide (also called parasuicide), this has been defined as the act not resulting in death in which an individual deliberately hurts himself; and the completed suicide that is a self-destructive behavior that ends the life of the person who carries it out.<sup>1-3</sup> Suicide is a worldwide problem and it is increasing through time.<sup>4</sup> Suicidal behavior has been investigated around the world, most of the studies have been based on Caucasian and Asian population, but in Latin American countries, there is no information related to this problem. The suicide mortality in Mexico has increased slowly but steadily over the last 40 years, in this country, the suicide is one of the five leading causes of death, and the third between people between 15 and 24 years of age.<sup>5,6</sup> There are studies that have tried to find and explain genetic causes of the disorder, because social factors alone can not explain completely the suicidal behavior.<sup>7</sup>

The receptor 5HT<sub>2C</sub> has been studied in the association with suicidal behavior.<sup>4</sup> This gene of serotonin receptor 2C lies on chromosome X, on position Xq24-q28 of the long arm. It has five introns and six exons and is, so far, the only G-protein binding receptor known to have the possibility of alternative splicing of mRNA and therefore of more protein isoforms.<sup>8</sup> 5-HT<sub>2C</sub> has been implicated in numerous brain functions, regulation of locomotion, sex, instinct and appetite to modulation of

1  
2  
3 mood and anxiety among others.<sup>9</sup> Since anxiety and mood disorders, as well as  
4 impulsiveness, are important suicide risk factors, the changes in serotonin receptor  
5  
6  
7  
8 2C could be linked to suicide.<sup>10</sup> The HTR2C (5-HT2C gene) has a vast number of  
9  
10 single nucleotide polymorphisms (SNPs). More of 1000 polymorphism have been  
11  
12 identified along the gene (according to snpper.chip.org, October 2, 2013).<sup>11</sup> This  
13  
14 gene has been associated with many diseases as schizophrenia,<sup>12 13</sup> weigh gain in  
15  
16 schizophrenia,<sup>14</sup> bipolar disorder,<sup>15 16</sup> alcoholism,<sup>17</sup> and substance abuse,<sup>18</sup>  
17  
18  
19 However, the association between HTR2C and suicidal behavioral remains  
20  
21 controversial, given that to date case-control studies include positive and negative  
22  
23 findings.<sup>19-23</sup>  
24  
25  
26  
27

### 28 **Aims and objectives**

29  
30  
31 Because of these controversial outcomes, the aims of the protocol study is to  
32  
33 evaluate the relation of the HTR2C gene and the suicidal behavior with a meta-  
34  
35 analysis. In order to have a better understanding of this association, we will study  
36  
37 rs547536, rs2192372, rs4272555, rs6318 and rs2428707 polymorphisms of  
38  
39 HTR2C gene in suicide attempters in Mexican population.  
40  
41  
42  
43  
44  
45  
46

### 47 **Methods/analysis**

### 48 49 50 51 52 53 **Meta-analysis**

54  
55  
56 This meta-analysis will follow the Preferred Reporting Items for Systematic  
57  
58  
59  
60

1  
2  
3  
4  
5  
6  
7  
8  
9  
10  
11  
12  
13  
14  
15  
16  
17  
18  
19  
20  
21  
22  
23  
24  
25  
26  
27  
28  
29  
30  
31  
32  
33  
34  
35  
36  
37  
38  
39  
40  
41  
42  
43  
44  
45  
46  
47  
48  
49  
50  
51  
52  
53  
54  
55  
56  
57  
58  
59  
60

Reviews and Meta-Analyses (PRISMA) criteria.<sup>24</sup>

### **Identification and selection of publications**

The literature will be obtained from PubMed databases using the keywords: “HTR2C and suicidal behavior”, “HTR2C and suicide”. The dates of publication of the searched papers will be from 2003 to 2014, Figure 1. Publications selected will meet the following criteria: (1) to be published in peer-reviewed journals, (2) to be written in English, (3) to contain independent data, (4) to be case-control association studies in which the frequencies of three genotypes are clearly stated or could be calculated, and (5) the use of healthy individuals as controls.

### **Data extraction**

Of each report the following data will be reviewed: authors, year of publication, region, number of cases and controls, gender, age, psychiatric diagnosis, ethnical origin, sample size and genotype and allele frequencies. The meta-analysis will be constructed taking into account the following categories: (a) exposed sick, (b) exposed not-sick, (c) not-exposed sick and (d) not- exposed not-sick. The “sick” term refers to subjects exhibiting suicidal behavior and the “exposed” term to the allele of risk.

### **Data analysis**

For the meta-analysis analysis, we are going to use the EPIDAT 3.1 program (<http://dxsp.sergas.es>). This software is freely available for epidemiologic analysis

1  
2  
3 of tabulated data. Data will be analyzed with the random-effects model following  
4  
5 the reports in literature.<sup>25-27</sup> Sample heterogeneity will be analyzed with the  
6  
7 Dersimonian and Laird's Q test. The results of the Q test will be complemented  
8  
9 with graphs to help visualize those studies favoring heterogeneity. The results of  
10  
11 the meta-analysis will be expressed as odds ratios (ORs). Pooled ORs will be  
12  
13 calculated respectively for each of the models used, viz.: allelic (Example: A vs. C),  
14  
15 additive (AA vs. CC), dominant (AA + AC vs. CC), and recessive (AA vs. AC +  
16  
17 CC). To address the problem of publication bias, the Egger's test and funnel plots  
18  
19 will be calculated with the EPIDAT 3.1 software. This plotting standardizes the  
20  
21 effect of each study on the vertical axis and its correspondent precision on the  
22  
23 horizontal axis. Finally, a chi-squared ( $\chi^2$ ) analysis will be used to calculate the  
24  
25 Hardy-Weinberg equilibrium to evaluate genotype distribution. Studies deemed for  
26  
27 inclusion in the systematic review will be scored for methodological quality using  
28  
29 the Newcastle-Ottawa Assessment Scale (NOS).<sup>28</sup> A score of six will be  
30  
31 considered as the cut-off point to distinguish higher from lower quality studies. Also  
32  
33 to give more support to our analysis, we will take in consideration de GRADES  
34  
35 scales procedures (<http://www.gradeworkinggroup.org>)  
36  
37  
38  
39  
40  
41  
42  
43

## 44 Discussion

45  
46  
47 Those who attempt suicide and survive, apart of having serious injuries (such as  
48  
49 broken bones, brain damage, or organ failure), very often develop depression and  
50  
51 other mental health problems, as consequences. It is well known that suicide not  
52  
53 only affects the person who commits it, is also affects the health of the community;  
54  
55 family and friends of people who commit suicide may experience shock, anger,  
56  
57  
58  
59  
60



1  
2  
3 guilt, and depression. The medical costs and lost wages associated with suicide  
4 also take their toll on the community. It has been proposed the importance of the  
5 analysis of the suicide; but before we can prevent suicide, we need to know how  
6 big the problem is, where it is, and whom it affects.  
7  
8  
9  
10  
11

12  
13 Besides the studies which reveal social factor that increase the possibility to  
14 commit a suicide, there are others that support that it could exist a genetic link to  
15 suicide; in these studies we observe that people who completed suicide or who  
16 have had suicidal thoughts or behavior are more likely to have a family history of  
17 suicide. Therefore we can suggest that more studies are necessary to understand  
18 a possible genetic component that could contribute to suicidal tendencies<sup>29</sup>. The  
19 serotonin neurotransmission system has received the most consideration as a  
20 candidate gene in suicidal behavior studies due to its role in mood regulation and  
21 because its function is altered in suicide victims.<sup>30</sup> The most studied genes are the  
22 tryptophan hydroxylase 1 and 2 (TPH-1 and TPH-2), serotonin transporter (5-HTT  
23 or SLC6A4) and the serotonin receptors (5-HTR1A, 5-HTR1B, 5-HTR2A, 5-  
24 HTR2C, etc).<sup>31</sup> Being the last one the most recently studied in this area around the  
25 world Figure 2. The gene 5-HTR2C is an excellent candidate, although its study  
26 needs a detailed analysis because its chromosomal location.<sup>29</sup> Also, a systematic  
27 review and meta-analysis could improve the understanding of a genetic component  
28 in suicidal behavior. This study protocol could show evidence of the role that the 5-  
29 HTR2C plays in the suicidal behavior in all population with an up-to-date meta-  
30 analysis and systematic review with the existing publications.  
31  
32  
33  
34  
35  
36  
37  
38  
39  
40  
41  
42  
43  
44  
45  
46  
47  
48  
49  
50  
51  
52  
53  
54  
55  
56  
57  
58  
59  
60

**Ethics and dissemination:** The study will describe the association between HTR2C gene and suicidal behavior. The results of this study will be disseminated by peer-reviewed publication and scientific presentations in Mexico and the world.

## References

1. Antypa N, Serretti A, Rujescu D. Serotonergic genes and suicide: a systematic review. *Eur Neuropsychopharmacol* 2013;23:1125-42
2. Pooley EC, Houston K, Hawton K, Harrison PJ. Deliberate self-harm is associated with allelic variation in the tryptophan hydroxylase gene (TPH A779C), but not with polymorphisms in five other serotonergic genes. *Psychol Med* 2003;33:775-83
3. Serretti A, Calati R, Giegling I, Hartmann AM, Moller HJ, Rujescu D. Serotonin receptor HTR1A and HTR2C variants and personality traits in suicide attempters and controls. *J Psychiatr Res* 2009;43:519-25
4. Martin CB, Ramond F, Farrington DT, et al. RNA splicing and editing modulation of 5-HT(2C) receptor function: relevance to anxiety and aggression in VGV mice. *Mol Psychiatry* 2013;18:656-65
5. Tovilla-Zarate CA, Gonzalez-Castro TB, Juarez-Rojop I, et al. Study on genes of the serotonergic system and suicidal behavior: protocol for a case-control study in Mexican population. *BMC Psychiatry* 2014;14:14-29
6. Serretti A, Mandelli L, Giegling I, et al. HTR2C and HTR1A gene variants in German and Italian suicide attempters and completers. *Am J Med Genet B Neuropsychiatr Genet* 2007;5:291-9
7. Cavarec L, Vincent L, Le Borgne C, et al. In vitro screening for drug-induced depression and/or suicidal adverse effects: a new toxicogenomic assay based on CE-SSCP analysis of HTR2C mRNA editing in SH-SY5Y cells. *Neurotox Res* 2013;23:49-62
8. De Luca V, Tharmaligam S, Strauss J, Kennedy JL. 5-HT2C receptor and MAO-A interaction analysis: no association with suicidal behaviour in bipolar patients. *Eur Arch Psychiatry Clin Neurosci* 2008;258:428-33
9. Mandelli L, Serretti A. Gene environment interaction studies in depression and suicidal behavior: An update. *Neurosci Biobehav Rev* 2013;37:2375-97
10. Iwamoto K, Kato T. RNA editing of serotonin 2C receptor in human postmortem brains of major mental disorders. *Neurosci Lett* 2003;346:169-72
11. Riva A, Kohane IS. A SNP-centric database for the investigation of the human genome. *BMC Bioinformatics* 2004;5:33
12. Castensson A, Aberg K, McCarthy S, Saetre P, Andersson B, Jazin E. Serotonin receptor 2C (HTR2C) and schizophrenia: examination of possible medication and genetic influences on expression levels. *Am J Med Genet B Neuropsychiatr Genet* 2005;5:84-9
13. Castensson A, Emilsson L, Sundberg R, Jazin E. Decrease of serotonin receptor 2C in schizophrenia brains identified by high-resolution mRNA expression analysis. *Biol Psychiatry* 2003;54:1212-21

14. Thompson A, Lavedan C, Volpi S. Absence of weight gain association with the HTR2C -759C/T polymorphism in patients with schizophrenia treated with iloperidone. *Psychiatry Res* 2010;175:271-3
15. Manchia M, Zai CC, Squassina A, Vincent JB, De Luca V, Kennedy JL. Mixture regression analysis on age at onset in bipolar disorder patients: investigation of the role of serotonergic genes. *Eur Neuropsychopharmacol* 2010;20:663-70
16. Oruc L, Verheyen GR, Furac I, et al. Association analysis of the 5-HT2C receptor and 5-HT transporter genes in bipolar disorder. *Am J Med Genet* 1997;74:504-6
17. Himei A, Kono Y, Yoneda H, et al. An association study between alcoholism and the serotonergic receptor genes. *Alcohol Clin Exp Res* 2000;24:341-2
18. Herman AI, Balogh KN. Polymorphisms of the serotonin transporter and receptor genes: susceptibility to substance abuse. *Subst Abuse Rehabil* 2012;3:49-57
19. Judy JT, Seifuddin F, Mahon PB, et al. Association study of serotonin pathway genes in attempted suicide. *Am J Med Genet B Neuropsychiatr Genet* 2012;1:112-9
20. Videtic A, Peternelj TT, Zupanc T, Balazic J, Komel R. Promoter and functional polymorphisms of HTR2C and suicide victims. *Genes Brain Behav* 2009;8:541-5
21. Zhang J, Shen Y, He G, et al. Lack of association between three serotonin genes and suicidal behavior in Chinese psychiatric patients. *Prog Neuropsychopharmacol Biol Psychiatry* 2008;32:467-71
22. Turecki G, Sequeira A, Gingras Y, et al. Suicide and serotonin: study of variation at seven serotonin receptor genes in suicide completers. *Am J Med Genet B Neuropsychiatr Genet* 2003;1:36-40
23. Stefulj J, Buttner A, Kubat M, et al. 5HT-2C receptor polymorphism in suicide victims. Association studies in German and Slavic populations. *Eur Arch Psychiatry Clin Neurosci* 2004;254:224-7
24. Swartz MK. *The PRISMA statement: a guideline for systematic reviews and meta-analyses*: J Pediatr Health Care. 2011 Jan-Feb;25(1):1-2. doi: 10.1016/j.pedhc.2010.09.006.
25. Gonzalez-Castro TB, Tovilla-Zarate C, Juarez-Rojop I, et al. Association of the 5HTR2A gene with suicidal behavior: case-control study and updated meta-analysis. *BMC Psychiatry* 2013;13:13-25
26. Gonzalez-Castro TB, Tovilla-Zarate CA. Meta-analysis: A tool for clinical and experimental research in psychiatry. *Nord J Psychiatry* 2013;17:17
27. Gonzalez-Castro TB, Tovilla-Zarate CA, Juarez-Rojop I, et al. Association of 5HTR1A gene variants with suicidal behavior: case-control study and updated meta-analysis. *J Psychiatr Res* 2013;47:1665-72
28. Stang A. Critical evaluation of the Newcastle-Ottawa scale for the assessment of the quality of nonrandomized studies in meta-analyses. *Eur J Epidemiol* 2010;25:603-5
29. Mann JJ. The serotonergic system in mood disorders and suicidal behaviour. *Philos Trans R Soc Lond B Biol Sci* 2013;368
30. Sadkowski M, Dennis B, Clayden RC, et al. *The role of the serotonergic system in suicidal behavior*: *Neuropsychiatr Dis Treat*. 2013;9:1699-1716. Epub 2013 Nov 6.
31. Pandey GN. Biological basis of suicide and suicidal behavior. *Bipolar Disord* 2013;15:524-41

**Author's contribution:**

TZCA and GCTB conceived the study, participated in the design and helped to draft the manuscript. GA, JRI and LNML helped to select the genes and polymorphisms in the study. TZCA, GCTB and A wrote the draft of the manuscript. All authors read, critically revised, and approved the final version of the manuscript.

**Funding statement:**

This research received no specific grant from any funding.

**Competing interests statement:**

The authors declare not to have any competing interests.

## Figure legends

### Figure 1

Representation of 5-HTR2C gene studies over time. (All data from: [www.gopubmed.com](http://www.gopubmed.com))

### Figure 2

World map of Genetic association studies of 5-HTR2C with suicidal behavior (All data from: [www.gopubmed.com](http://www.gopubmed.com))

1  
2  
3  
4  
5  
6  
7  
8  
9  
10  
11  
12  
13  
14  
15  
16  
17  
18  
19  
20  
21  
22  
23  
24  
25  
26  
27  
28  
29  
30  
31  
32  
33  
34  
35  
36  
37  
38  
39  
40  
41  
42  
43

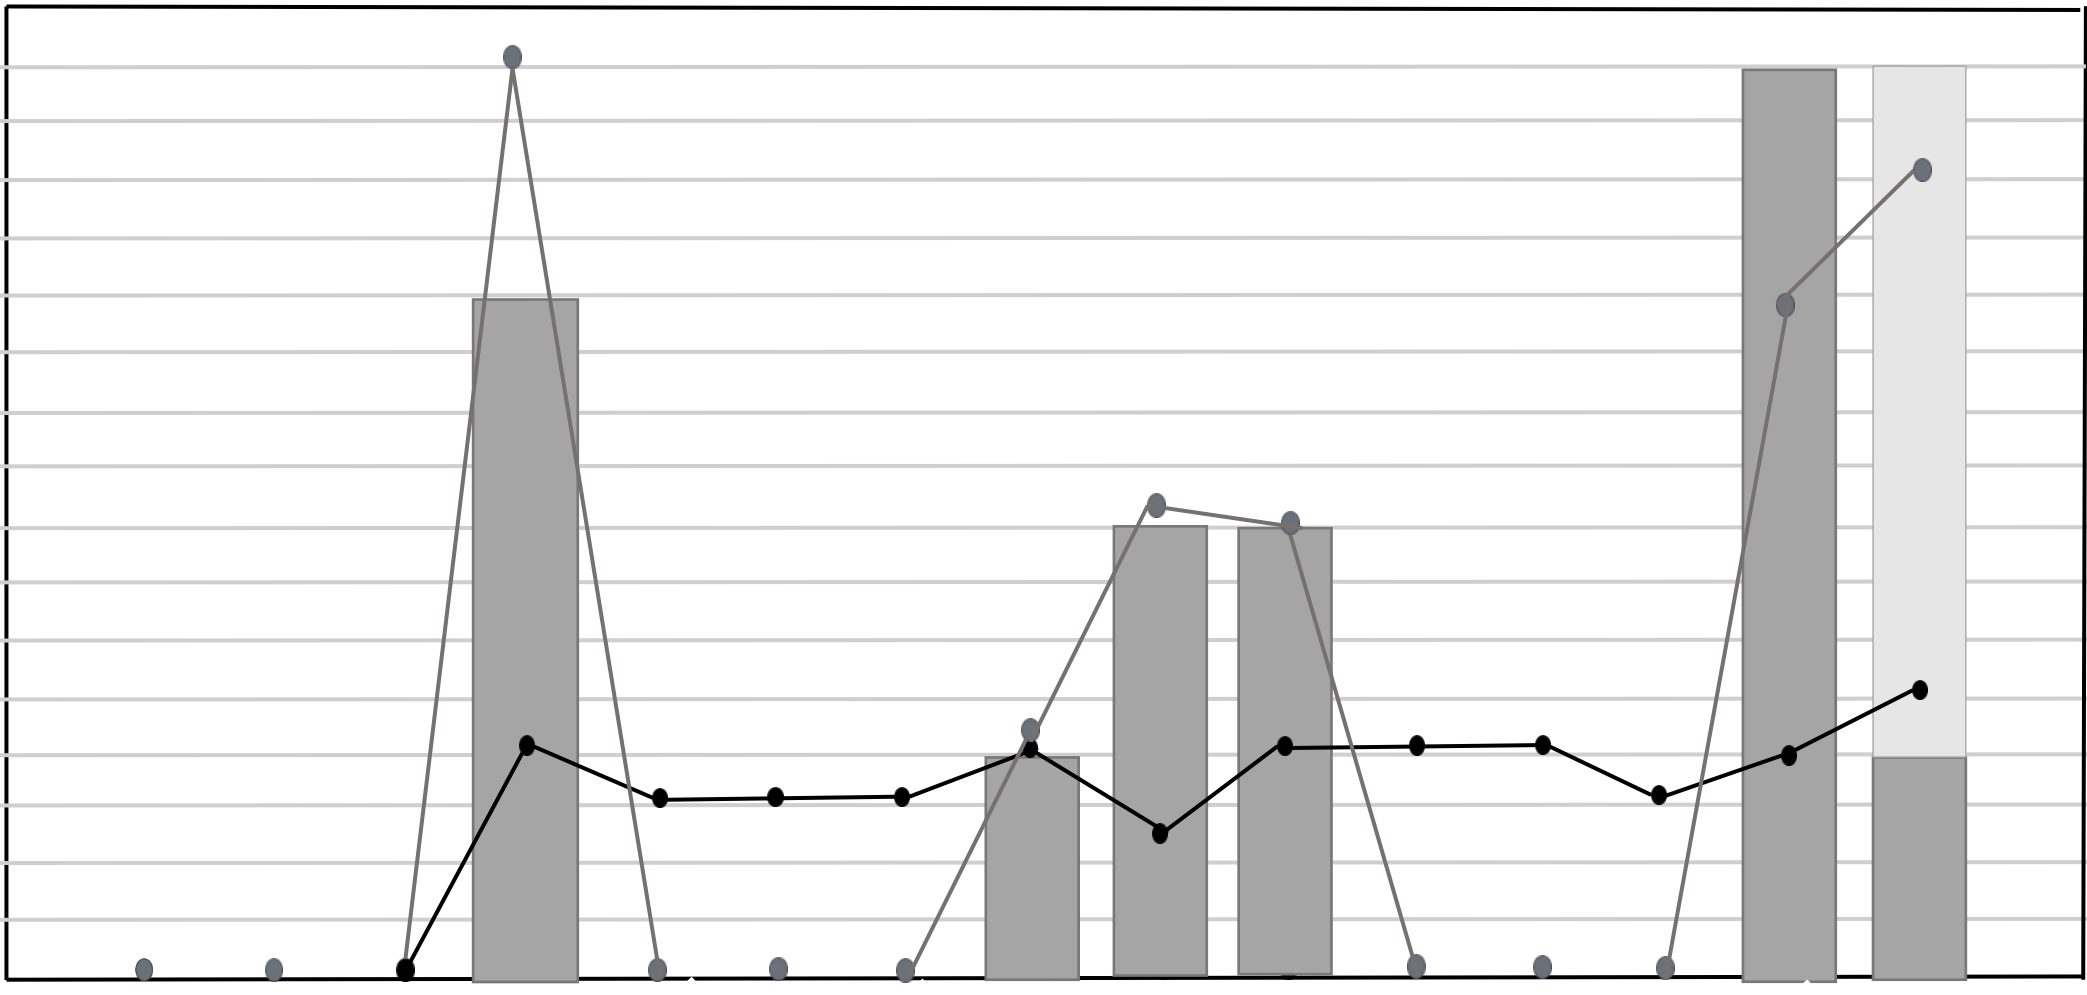

For peer review only - <http://bmjopen.bmj.com/site/about/guidelines.xhtml>

Publications    Publications (current year estimated)    Relative Research Interest    Relative Research Interest (smoothed)

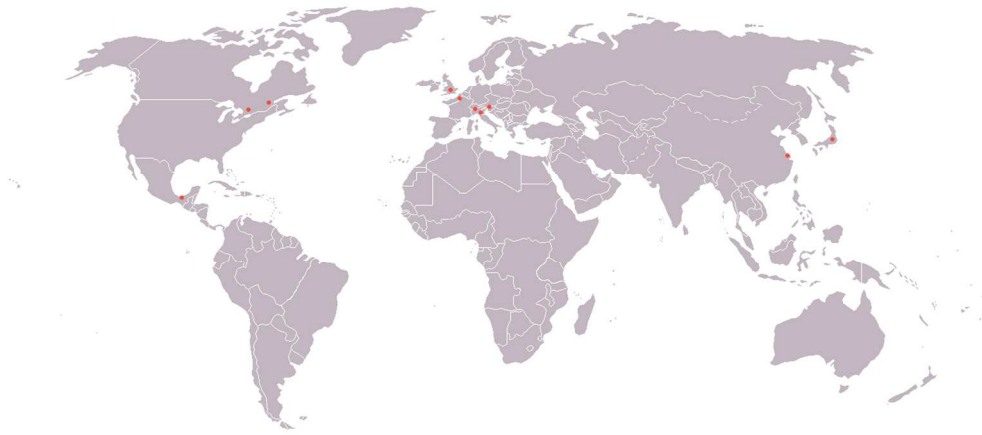

World map of Genetic association studies of 5-HT<sub>2C</sub> with suicidal behavior (All data from: [www.gopubmed.com](http://www.gopubmed.com))

For peer review only

# BMJ Open

## Association between HTR2C gene variants and suicidal behavior: protocol for systematic review and meta-analysis of genetic studies

|                                 |                                                                                                                                                                                                                                                                                                                                                                                                                                                                                                                                                                                        |
|---------------------------------|----------------------------------------------------------------------------------------------------------------------------------------------------------------------------------------------------------------------------------------------------------------------------------------------------------------------------------------------------------------------------------------------------------------------------------------------------------------------------------------------------------------------------------------------------------------------------------------|
| Journal:                        | <i>BMJ Open</i>                                                                                                                                                                                                                                                                                                                                                                                                                                                                                                                                                                        |
| Manuscript ID:                  | bmjopen-2014-005423.R1                                                                                                                                                                                                                                                                                                                                                                                                                                                                                                                                                                 |
| Article Type:                   | Protocol                                                                                                                                                                                                                                                                                                                                                                                                                                                                                                                                                                               |
| Date Submitted by the Author:   | 11-Jul-2014                                                                                                                                                                                                                                                                                                                                                                                                                                                                                                                                                                            |
| Complete List of Authors:       | González-Castro, Thelma; Universidad Juárez Autónoma de Tabasco, División Académica de Ciencias de la Salud Juárez-Rojop, Isela; Universidad Juárez Autónoma de Tabasco, División Académica de Ciencias de la Salud Genis-Mendoza, Alma; Instituto de Medicina Genómica (INMEGEN), Servicios de Atención Psiquiátrica (SAP), Secretaría de Salud López-Narváez, María; Hospital General de Yajalon, Secretaría de Salud Tovilla-Zárate, Carlos; Universidad Juárez Autónoma de Tabasco, División Multidisciplinaria de Comalcalco, División Académica Multidisciplinaria de Comalcalco |
| <b>Primary Subject Heading</b>: | Mental health                                                                                                                                                                                                                                                                                                                                                                                                                                                                                                                                                                          |
| Secondary Subject Heading:      | Mental health                                                                                                                                                                                                                                                                                                                                                                                                                                                                                                                                                                          |
| Keywords:                       | PSYCHIATRY, Suicide & self-harm < PSYCHIATRY, STATISTICS & RESEARCH METHODS                                                                                                                                                                                                                                                                                                                                                                                                                                                                                                            |
|                                 |                                                                                                                                                                                                                                                                                                                                                                                                                                                                                                                                                                                        |

SCHOLARONE™  
Manuscripts



1  
2  
3 1 **Association between HTR2C gene variants and suicidal behavior: protocol**  
4 2 **for systematic review and meta-analysis of genetic studies.**  
5  
6 3  
7

8 4 González-Castro Thelma Beatriz<sup>1</sup>, Juárez-Rojop Isela<sup>1</sup>, Genis Alma<sup>2</sup>, López-  
9 5 Narváez María Lilia<sup>3</sup> Tovilla-Zárate Carlos Alfonso<sup>4</sup> \*

10 6 <sup>1</sup>Universidad Juárez Autónoma de Tabasco, División Académica de Ciencias de la  
11 7 Salud, Villahermosa, Tabasco, México.

12 8 <sup>2</sup> Instituto Nacional de Medicina Genómica (INMEGEN), Servicios de Atención  
13 9 Psiquiátrica (SAP), Secretaría de Salud. México, D. F., México.

14 10 <sup>3</sup> Hospital General de Yajalón. Secretaria de Salud, Yajalón, Chiapas, México.

15 11 <sup>4</sup> Universidad Juárez Autónoma de Tabasco, División Académica Multidisciplinaria  
16 12 de Comalcalco, Comalcalco, Tabasco, México.  
17  
18  
19  
20  
21  
22  
23  
24  
25

26 15 Email addresses:

27  
28 16 GCTB: thelma.glez.castro@gmail.com

29  
30 17 JRI: iselajua22@yahoo.com.mx

31  
32 18 GA: genis76@yahoo.com

33  
34 19 LNL: dralilialonar@yahoo.com.mx

35  
36 20 TZCA: alfonso\_tovillaz@yahoo.com.mx

37  
38 21 \*Corresponding author  
39  
40  
41

42 23 *\*Correspondence to: Dr. Carlos Alfonso Tovilla Zárate, Universidad Juárez*  
43 24 *Autónoma de Tabasco, División Académica Multidisciplinaria de Comalcalco,*  
44 25 *Ranchería Sur, Cuarta Sección, C.P. 86650, Comalcalco, Tabasco, México. Tel.*  
45 26 *52 9933581500 ext. 6901, e-mail: alfonso\_tovillaz@yahoo.com.mx*  
46  
47  
48  
49  
50  
51  
52  
53  
54  
55  
56  
57  
58  
59  
60

1

2 **Abstract**

3 **Introduction:** Suicide is an important public health problem and one of the most  
4 common causes of death throughout the world. Suicidal behavior is complex and  
5 has multi-factorial causes; case-control studies have reported an association  
6 between an alteration of the serotonin system and suicidal behavior; recently, the  
7 5-HTRC2 serotonin receptor gene has been suggested to be involved in its  
8 pathogenesis.

9 **Methods and analysis:** To evaluate the role of the 5-HTR2C gene in suicidal  
10 behavior, we will perform a systematic review and a meta-analysis of world wide  
11 reports that have investigated this association. This analysis will be reported  
12 following the Preferred Reporting Items for Systematic Reviews and Meta-  
13 Analyses (PRISMA) criteria. Studies deemed for inclusion in the systematic review  
14 will be scored for methodological quality using the Newcastle-Ottawa Assessment  
15 Scale (NOS). The inclusion criteria will be to present independent data, must be  
16 case-control studies, and be published in journal peer-reviews. To generate more  
17 accurate analyses, we will grade the reports using the GRADES scale procedures.

18 **Ethics and dissemination:** This study will describe the association between  
19 HTR2C gene and suicidal behavior. The results will be disseminated by a peer-  
20 reviewed publication and scientific presentations in Mexico and throughout the  
21 world.

22 **Protocol registration:** PROSPERO CRD42014009213

23

1  
2  
3  
4  
5  
6  
7  
8  
9  
10  
11  
12  
13  
14  
15  
16  
17  
18  
19  
20  
21  
22  
23  
24  
25  
26  
27  
28  
29  
30  
31  
32  
33  
34  
35  
36  
37  
38  
39  
40  
41  
42  
43  
44  
45  
46  
47  
48  
49  
50  
51  
52  
53  
54  
55  
56  
57  
58  
59  
60

1  
2  
3  
4  
5  
6  
7  
8  
9  
10  
11  
12  
13  
14  
15  
16  
17  
18  
19  
20  
21  
22  
23  
24  
25  
26  
27  
28  
29  
30  
31  
32  
33  
34  
35  
36  
37  
38  
39  
40  
41  
42  
43  
44  
45  
46  
47  
48  
49  
50  
51  
52  
53  
54  
55  
56  
57  
58  
59  
60

### Strengths and limitations of the study

- The results could improve the understanding of the genetic component of suicidal behavior.
- This study could show evidence of an association between the 5-HTR2C gene and suicidal behavior.
- We will perform an analysis by gender that could determine if the 5-HTR2C gene affects female and male differently.
- A small amount of reports (and therefore a small sample size) is a possible limitation.
- High heterogeneity among the reports could be a limitation.

1

2 **Introduction**

3

4 Suicide is the act of taking one's own life voluntarily and intentionally. Suicidal  
5 behavior (SB) includes a wide spectrum of self-destructive actions that can be  
6 classified as 1) suicidal ideation (thoughts of ending one's own life, including  
7 planning a specific method to succeed), 2) attempted suicide or parasuicide (when  
8 an individual deliberately hurts himself but the act does not result in death) and 3)  
9 completed suicide (when the action ends the life of the person who carries it out).<sup>1-3</sup>

10 Suicide is a worldwide problem and it is increasing through time.<sup>4-6</sup> Social factors  
11 alone can not fully explain the suicidal behavior,<sup>7-9</sup> furthermore, some studies have  
12 found that there is a potential genetic component in it.<sup>1 10</sup>

13 The genetic studies that have tried to identify genes that predispose to suicidal  
14 behavior, have focused on genes that codify proteins involved in the serotonergic  
15 system, since this system interferes in controlling mood, emotions, aggression and  
16 anxiety, this again could influence suicidal behavior.<sup>11-13</sup> Recently, the 5HTR2C  
17 gene has been proposed to be related to suicidal behavior,<sup>10 14-17</sup> due to its  
18 association with other mental diseases such as schizophrenia,<sup>18-20</sup> bipolar  
19 disorder,<sup>21 22</sup> alcoholism,<sup>23</sup> and substance abuse.<sup>24</sup> Furthermore, the 5HTR2C gene  
20 has been associated with anxiety, mood disorders and impulsiveness, and these  
21 are important suicide risk factors.<sup>16 25</sup>

22 The HTR2C (5-HTR2C gene) is a serotonin 2C receptor that lies on the X  
23 chromosome, long arm, position Xq24-q28. It has five introns and six exons and so

1 far, is the only G-protein binding receptor known to alternative splicing the mRNA,  
2 therefore to have more protein isoforms.<sup>26</sup> It has a vast number of single nucleotide  
3 polymorphisms (SNPs). More of 1000 polymorphism have been identified along the  
4 gene (according to snpper.chip.org, October 2, 2013).<sup>27</sup> To date, the association  
5 between the HTR2C and suicidal behavioral remains controversial since the  
6 reports include positive and negative findings.<sup>28-32</sup> The figure 1 shows the HTR2C  
7 and suicide studies over time. Consequently, it is important to perform a deeper  
8 study assessing the possible connection between the HTR2C gene and suicidal  
9 behavior.

## 11 **Aims and objectives**

12 This study aims to systematically review and meta-analyze world wide reports that  
13 have researched for an association between the serotonin 2C receptor gene (5-  
14 HTR2C) and suicidal behavior. Particularly, it aims to focus on rs547536,  
15 rs2192372, rs4272555, rs24287207 and rs6318 polymorphisms in order to detect  
16 which ones act as a possible risk factor.

## 18 **Methods/analysis**

### 19 **Systematic Review and Meta-analysis**

20 This meta-analysis will be reported following the Preferred Reporting Items for  
21 Systematic Reviews and Meta-Analyses (PRISMA) criteria.<sup>33</sup>

## 1 Identification and selection of publications

2 For both, the systematic review and the meta-analysis, the literature will be  
3 searched from three databases: PubMed, Web of Science and EBSCO using the  
4 keywords: "HTR2C and suicidal behavior", "HTR2C and suicide". These words will  
5 be combined to retrieve the summaries.

6 Publications selected will meet the following criteria: (1) to be published in peer-  
7 reviewed journals, (2) to contain independent data, (3) to be case-control  
8 association studies in which the frequencies of three genotypes are clearly stated  
9 or could be calculated, (4) the use of healthy individuals or psychiatric patients  
10 without suicidal behavior as controls; (5) to include one or more of the three forms  
11 of suicidal behavior (suicidal ideation, attempted suicide or completed suicide); and  
12 (6) to be written in English. The procedure planned is exemplified on figure 2.

13 To determine inclusion, two researchers (González-Castro and Juárez-Rojop) will  
14 work independently screening each of the titles, abstracts and full texts. When the  
15 researchers disagree a third researcher (Tovilla-Zárate) will be consulted.

## 17 Data extraction

18 For the systematic review, the following data will be searched and analyzed:  
19 authors, year of publication, region, sample size, number of cases and controls,  
20 gender, age, psychiatric diagnosis, ethnical origin and finally, genotype and allele  
21 frequencies. The SNPs in study will be rs547536, rs2192372, rs4272555,

1 rs24287207 and rs6318.

2 The meta-analysis will be constructed following four categories: (a) exposed sick,  
3 (b) exposed not-sick, (c) not-exposed sick and (d) not- exposed not-sick. The “sick”  
4 term refers to subjects exhibiting suicidal behavior and the “exposed” term to the  
5 allele of risk.

6 The data extraction will be performed by González-Castro, Juárez-Rojop, Genis-  
7 Mendoza and López-Nárvaez.

## 8 **Data analysis**

9 The systematic review would be presented on tables comparing quality  
10 measurements and the data previously mentioned. Studies deemed for inclusion  
11 will be scored for methodological quality using the Newcastle-Ottawa Assessment  
12 Scale (NOS)<sup>34</sup>. A score of six will be considered as the cut-off point to distinguish  
13 higher from lower quality studies. To give more support to our analysis, we will  
14 consider the GRADES scale procedures (<http://www.gradeworkinggroup.org>).

15 For the meta-analysis we will use the EPIDAT 3.1 program (Software for  
16 Epidemiologic Analysis of Tabulated Data. Version 3.1. Pan American Health  
17 Organization; <http://dxsp.sergas.es>); this software is freely available for  
18 epidemiologic analysis of tabulated data. Data will be analyzed using the random-  
19 effects model following the reports in literature<sup>35-37</sup>. The sample heterogeneity will  
20 be measured with the Dersimonian and Laird’s Q test; we will also use graphs to  
21 help visualize those studies favoring heterogeneity. The results of the meta-  
22 analysis will be expressed as odds ratios (ORs). Pooled ORs will be calculated for

1 each model used, viz.: allelic (Example: A vs. C), additive (AA vs. CC), dominant  
2 (AA + AC vs. CC), and recessive (AA vs. AC + CC). Since the HTR2C gene is  
3 located on the X chromosome, an analysis by gender will be performed. To  
4 address the publication bias, the Egger's test and funnel plots will be calculated  
5 with the EPIDAT 3.1 software. This plotting will standardize the effect of each study  
6 on the vertical axis and its correspondent precision on the horizontal axis.  
7 Sensibility analysis will be performed. The influence of each study in the global  
8 estimation will be analyzed and graphed. The direction of the effect will be  
9 analyzed. To evaluate genotype distribution and calculate the Hardy-Weinberg  
10 equilibrium, we will use a chi-squared ( $\chi^2$ ) analysis. Regarding the presence of  
11 Hardy-Weinberg equilibrium, we will use the Pearson's chi-squared test to assess  
12 goodness of fit. Finally, the Haploview 4.2<sup>38</sup> will be used to calculate the linkage  
13 disequilibrium (LD) of the markers.

14 The analyzed of dates will be performed by Gonzalez-Castro and Tovilla-Zarate-  
15 Differences in the interpretation could be resolved by López-Narvaez.

16

## 17 Discussion

18 Suicide is a public health problem that affects entire communities and not only the  
19 suicidal person. The medical costs and lost wages associated with suicide also  
20 take their toll on the community. Therefore, it is crucial to better understand the  
21 etiology of suicidal behavior, as well as knowing how big the problem is and whom  
22 it affects.



1 Literature suggests that there could be a genetic factor linked to suicide. Some  
2 studies have proposed a hypothetical explanation using the Stress-Diathesis Model  
3 and have observed that people who have had suicidal behavior are more likely to  
4 have a family history of suicide.<sup>16</sup> Therefore we can suggest that a genetic  
5 component could contribute to suicidal tendencies.<sup>16</sup> The serotonin  
6 neurotransmission system has received the most consideration as candidate  
7 genes in suicidal behavior, since the serotonin system regulates mood,  
8 impulsiveness and anxiety which are important suicide risk factors. Furthermore,  
9 the serotonergic function is clearly altered in suicide victims.<sup>10</sup> Among the most  
10 studied genes, are the ones that codify to the tryptophan hydroxylase 1 and 2  
11 (TPH-1 and TPH-2), serotonin transporter (5-HTT or SLC6A4) and the serotonin  
12 receptors (5-HTR1A, 5-HTR1B, 5-HTR2A, 5-HTR2C, etc)<sup>39</sup>. Being the last one the  
13 most recently suggested around the world to be associated with suicidal behavior  
14 Figure 3. The gene 5-HTR2C needs a deeper analysis Performing a systematic  
15 review and a meta-analysis, this protocol could improve the understanding of the  
16 genetic component in suicidal behavior; regarding the data analysis, we will adopt  
17 the random effects model, because it accounts for additional sources of inter-study  
18 variation when heterogeneity exists and has a more reliable outcome.

19 This meta-analysis could present some limitations. First, the association between  
20 HTR2C and suicidal behavior is not widely studied; therefore, we might not find a  
21 sufficient amount of reports to analyze; furthermore, we are focusing on five  
22 polymorphisms and perhaps there are not enough reports of each one. Secondly,  
23 the reports will be limited to English language so the number of studies might be

1 too small. High heterogeneity due to differences in age, ethnicity, gender,  
2 education, wealth, etc. These limitations will decrease the statistical power of the  
3 study o reliability of our results.

4 Conversely, it would be the first meta-analysis associating between five SNPs of  
5 HTR2C and suicidal behavior with allelic, additive, dominant, and recessive  
6 models. In addition, this study protocol could demonstrate the link between the 5-  
7 HTR2C in the suicidal behavior of the general population.

8 Performing an analysis by gender is a strong point; in theory, due to its  
9 chromosomal location (X chromosome), this gene must affect females and males  
10 differently. The results could help to determine if the HTR2C gene is a risk factor in  
11 developing suicidal behavior. Indirectly, our study could help to understand the  
12 etiology of suicidal behavior.

13  
14 **Ethics and dissemination:** This study will describe the association between  
15 HTR2C gene and suicidal behavior. The results of this study will be disseminated  
16 by peer-reviewed publication and scientific presentations in Mexico and throughout  
17 the world.

1  
2  
3 1  
4  
5  
67 **2 Author's contribution:**  
8

9  
10 3 TZCA and GCTB conceived the study, participated in the design and helped to  
11 4 draft the manuscript. GA, JRI and LNML helped on the selection of genes and  
12 5 polymorphisms to study. TZCA, GCTB and A wrote the manuscript. All authors  
13 6 read, critically revised and approved the final version of the manuscript.  
14  
15  
16  
17  
18

19 7  
2021 8 **Funding statement:**  
22  
23

24 9 This research received no specific grant from any funding.  
25  
26  
27

28 10 **Competing interests statement:**  
29  
30

31 11 The authors declare not to have any competing interests.  
32  
33  
34  
35  
36  
37  
38  
39  
40  
41  
42  
43  
44  
45  
46  
47  
48  
49  
50  
51  
52  
53  
54  
55  
56  
57  
58  
59  
60

## References

1. Antypa N, Serretti A, Rujescu D. Serotonergic genes and suicide: a systematic review. *European neuropsychopharmacology : the journal of the European College of Neuropsychopharmacology* 2013;23:1125-42 doi: 10.1016/j.euroneuro.2013.03.013published Online First: Epub Date]].
2. Pooley EC, Houston K, Hawton K, et al. Deliberate self-harm is associated with allelic variation in the tryptophan hydroxylase gene (TPH A779C), but not with polymorphisms in five other serotonergic genes. *Psychological medicine* 2003;33:775-83
3. Serretti A, Calati R, Giegling I, et al. Serotonin receptor HTR1A and HTR2C variants and personality traits in suicide attempters and controls. *Journal of psychiatric research* 2009;43:519-25 doi: 10.1016/j.jpsychires.2008.06.005published Online First: Epub Date]].
4. Brzozowski FS, Soares GB, Benedet J, et al. Suicide time trends in Brazil from 1980 to 2005. *Cadernos de saude publica* 2010;26:1293-302
5. Jagodic HK, Agius M, Pregelj P. Inter-regional variations in suicide rates. *Psychiatria Danubina* 2012;24 Suppl 1:S82-5
6. Varnik P. Suicide in the world. *International journal of environmental research and public health* 2012;9:760-71 doi: 10.3390/ijerph9030760published Online First: Epub Date]].
7. Bani-Fatemi A, Polsinelli G, Kennedy JL, et al. Ethnicity and suicide attempt: analysis in bipolar disorder and schizophrenia. *BMC psychiatry* 2013;13:252 doi: 10.1186/1471-244x-13-252published Online First: Epub Date]].
8. Shinozaki G, Romanowicz M, Mrazek DA, et al. HTR2A gene-child abuse interaction and association with a history of suicide attempt among Caucasian depressed psychiatric inpatients. *Journal of affective disorders* 2013;150:1200-3 doi: 10.1016/j.jad.2013.05.028published Online First: Epub Date]].
9. Choo C, Diederich J, Song I, et al. Cluster analysis reveals risk factors for repeated suicide attempts in a multi-ethnic Asian population. *Asian J Psychiatr* 2014;8:38-42 doi: 10.1016/j.ajp.2013.10.001published Online First: Epub Date]].
10. Sadkowski M, Dennis B, Clayden RC, et al. The role of the serotonergic system in suicidal behavior. *Neuropsychiatric disease and treatment* 2013;9:1699-716 doi: 10.2147/ndt.s50300published Online First: Epub Date]].
11. Tovilla-Zarate CA, Gonzalez-Castro TB, Juarez-Rojop I, et al. Study on genes of the serotonergic system and suicidal behavior: protocol for a case-control study in Mexican population. *BMC psychiatry* 2014;14:29 doi: 10.1186/1471-244x-14-29published Online First: Epub Date]].
12. Mandelli L, Serretti A. Gene environment interaction studies in depression and suicidal behavior: An update. *Neuroscience and biobehavioral reviews* 2013;37:2375-97 doi: 10.1016/j.neubiorev.2013.07.011published Online First: Epub Date]].
13. Dracheva S, Patel N, Woo DA, et al. Increased serotonin 2C receptor mRNA editing: a possible risk factor for suicide. *Molecular psychiatry* 2008;13:1001-10 doi: 10.1038/sj.mp.4002081published Online First: Epub Date]].
14. Serretti A, Mandelli L, Giegling I, et al. HTR2C and HTR1A gene variants in German and Italian suicide attempters and completers. *American journal of medical genetics. Part B, Neuropsychiatric genetics : the official publication of the International Society of Psychiatric Genetics* 2007;144b:291-9 doi: 10.1002/ajmg.b.30432published Online First: Epub Date]].
15. Cavarec L, Vincent L, Le Borgne C, et al. In vitro screening for drug-induced depression and/or suicidal adverse effects: a new toxicogenomic assay based on CE-SSCP analysis of HTR2C

- 1  
2  
3 1 mRNA editing in SH-SY5Y cells. *Neurotoxicity research* 2013;23:49-62 doi:  
4 2 10.1007/s12640-012-9324-9published Online First: Epub Date]].  
5 3  
6 3 16. Mann JJ. The serotonergic system in mood disorders and suicidal behaviour. *Philosophical*  
7 4 *transactions of the Royal Society of London. Series B, Biological sciences*  
8 5 2013;368:20120537 doi: 10.1098/rstb.2012.0537published Online First: Epub Date]].  
9 6 17. Iwamoto K, Kato T. RNA editing of serotonin 2C receptor in human postmortem brains of major  
10 7 mental disorders. *Neurosci Lett* 2003;346:169-72  
11 8 18. Castensson A, Aberg K, McCarthy S, et al. Serotonin receptor 2C (HTR2C) and schizophrenia:  
12 9 examination of possible medication and genetic influences on expression levels. *American*  
13 10 *journal of medical genetics. Part B, Neuropsychiatric genetics : the official publication of*  
14 11 *the International Society of Psychiatric Genetics* 2005;134b:84-9 doi:  
15 12 10.1002/ajmg.b.30151published Online First: Epub Date]].  
16 13 19. Castensson A, Emilsson L, Sundberg R, et al. Decrease of serotonin receptor 2C in  
17 14 schizophrenia brains identified by high-resolution mRNA expression analysis. *Biological*  
18 15 *psychiatry* 2003;54:1212-21  
19 16 20. Thompson A, Lavedan C, Volpi S. Absence of weight gain association with the HTR2C -759C/T  
20 17 polymorphism in patients with schizophrenia treated with iloperidone. *Psychiatry research*  
21 18 2010;175:271-3 doi: 10.1016/j.psychres.2009.03.020published Online First: Epub Date]].  
22 19 21. Manchia M, Zai CC, Squassina A, Vincent JB, et al. Mixture regression analysis on age at onset  
23 20 in bipolar disorder patients: investigation of the role of serotonergic genes. *European*  
24 21 *neuropsychopharmacology : the journal of the European College of*  
25 22 *Neuropsychopharmacology* 2010;20:663-70 doi:  
26 23 10.1016/j.euroneuro.2010.04.001published Online First: Epub Date]].  
27 24 22. Oruc L, Verheyen GR, Furac I, et al. Association analysis of the 5-HT2C receptor and 5-HT  
28 25 transporter genes in bipolar disorder. *American journal of medical genetics* 1997;74:504-6  
29 26 23. Himei A, Kono Y, Yoneda H, et al. An association study between alcoholism and the  
30 27 serotonergic receptor genes. *Alcoholism, clinical and experimental research* 2000;24:341-2  
31 28 24. Herman AI, Balogh KN. Polymorphisms of the serotonin transporter and receptor genes:  
32 29 susceptibility to substance abuse. *Substance abuse and rehabilitation* 2012;3:49-57 doi:  
33 30 10.2147/sar.s25864published Online First: Epub Date]].  
34 31 25. Bortolato M, Pivac N, Muck Seler D, et al. The role of the serotonergic system at the interface  
35 32 of aggression and suicide. *Neuroscience* 2013;236:160-85 doi:  
36 33 10.1016/j.neuroscience.2013.01.015published Online First: Epub Date]].  
37 34 26. De Luca V, Tharmaligam S, Strauss J, et al. 5-HT2C receptor and MAO-A interaction analysis: no  
38 35 association with suicidal behaviour in bipolar patients. *European archives of psychiatry*  
39 36 *and clinical neuroscience* 2008;258:428-33 doi: 10.1007/s00406-008-0815-xpublished  
40 37 Online First: Epub Date]].  
41 38 27. Riva A, Kohane IS. A SNP-centric database for the investigation of the human genome. *BMC*  
42 39 *bioinformatics* 2004;5:33 doi: 10.1186/1471-2105-5-33published Online First: Epub  
43 40 Date]].  
44 41 28. Judy JT, Seifuddin F, Mahon PB, et al. Association study of serotonin pathway genes in  
45 42 attempted suicide. *Am J Med Genet B Neuropsychiatr Genet* 2012;1:112-9  
46 43 29. Videtic A, Peternelj TT, Zupanc T, et al. Promoter and functional polymorphisms of HTR2C and  
47 44 suicide victims. *Genes Brain Behav* 2009;8:541-5  
48 45 30. Zhang J, Shen Y, He G, et al. Lack of association between three serotonin genes and suicidal  
49 46 behavior in Chinese psychiatric patients. *Prog Neuropsychopharmacol Biol Psychiatry*  
50 47 2008;32:467-71  
51  
52  
53  
54  
55  
56  
57  
58  
59  
60

- 1  
2  
3 1 31. Turecki G, Sequeira A, Gingras Y, et al. Suicide and serotonin: study of variation at seven  
4 2 serotonin receptor genes in suicide completers. *Am J Med Genet B Neuropsychiatr Genet*  
5 3 2003;1:36-40  
6 4  
7 4 32. Stefulj J, Buttner A, Kubat M, et al. 5HT-2C receptor polymorphism in suicide victims.  
8 5 Association studies in German and Slavic populations. *Eur Arch Psychiatry Clin Neurosci*  
9 6 2004;254:224-7  
10 7 33. Swartz MK. *The PRISMA statement: a guideline for systematic reviews and meta-analyses*: J  
11 8 *Pediatr Health Care*. 2011 Jan-Feb;25(1):1-2. doi: 10.1016/j.pedhc.2010.09.006.  
12 9 34. Stang A. Critical evaluation of the Newcastle-Ottawa scale for the assessment of the quality of  
13 10 nonrandomized studies in meta-analyses. *Eur J Epidemiol* 2010;25:603-5  
14 11 35. Gonzalez-Castro TB, Tovilla-Zarate C, Juarez-Rojop I, et al. Association of the 5HTR2A gene with  
15 12 suicidal behavior: case-control study and updated meta-analysis. *BMC Psychiatry*  
16 13 2013;13:13-25  
17 14 36. Gonzalez-Castro TB, Tovilla-Zarate CA. Meta-analysis: A tool for clinical and experimental  
18 15 research in psychiatry. *Nord J Psychiatry* 2013;17:17  
19 16 37. Gonzalez-Castro TB, Tovilla-Zarate CA, Juarez-Rojop I, et al. Association of 5HTR1A gene  
20 17 variants with suicidal behavior: case-control study and updated meta-analysis. *J Psychiatr*  
21 18 *Res* 2013;47:1665-72  
22 19 38. Barrett JC, Fry B, Maller J, Daly MJ. Haploview: analysis and visualization of LD and haplotype  
23 20 maps. *Bioinformatics* 2005;21:263-5 doi: 10.1093/bioinformatics/bth457published Online  
24 21 First: Epub Date]].  
25 22 39. Pandey GN. Biological basis of suicide and suicidal behavior. *Bipolar Disord* 2013;15:524-41  
26  
27  
28  
29  
30  
31  
32  
33 24  
34  
35  
36  
37  
38  
39  
40  
41  
42  
43  
44  
45  
46  
47  
48  
49  
50  
51  
52  
53  
54  
55  
56  
57  
58  
59  
60

1  
2  
3 14  
5 2 **Figure legends**6  
7  
8  
9 3 Figure 110  
11  
12 4 Representation of 5-HTR2C gene studies over time. (All data from:  
13  
14 [www.gopubmed.com](http://www.gopubmed.com))  
1516  
17  
18 6 **Figure 2.**19  
20 7 Flow-chart for the search strategy and the inclusion/exclusion criteria to be used in  
21  
22 8 the meta-analysis and systematic review.  
2324  
25 9  
2627  
28 10 Figure 329  
30  
31 11 World map of Genetic association studies of 5-HTR2C with suicidal behavior (All  
32  
33 12 data from: [www.gopubmed.com](http://www.gopubmed.com)  
3435  
36  
37 13  
38  
39  
40  
41  
42  
43  
44  
45  
46  
47  
48  
49  
50  
51  
52  
53  
54  
55  
56  
57  
58  
59  
60

1  
2  
3 **1 Association between HTR2C gene variants and suicidal behavior: protocol**  
4 **2 for systematic review and meta-analysis of genetic studies.**  
5  
6  
7

8  
9 4 González-Castro Thelma Beatriz<sup>1</sup>, Juárez-Rojop Isela<sup>1</sup>, Genis Alma<sup>2</sup>, López-  
10 5 Narváez María Lilia<sup>3</sup> Tovilla-Zárate Carlos Alfonso<sup>4</sup> \*

11  
12 <sup>1</sup>Universidad Juárez Autónoma de Tabasco, División Académica de Ciencias de la  
13 6 Salud, Villahermosa, Tabasco, México.  
14 7

15 <sup>2</sup> Instituto Nacional de Medicina Genómica (INMEGEN), Servicios de Atención  
16 8 Psiquiátrica (SAP), Secretaría de Salud. México, D. F., México.  
17 9

18 <sup>3</sup> Hospital General de Yajalón. Secretaria de Salud, Yajalón, Chiapas, México.  
19 10

20 <sup>4</sup> Universidad Juárez Autónoma de Tabasco, División Académica Multidisciplinaria  
21 11 de Comalcalco, Comalcalco, Tabasco, México.  
22 12  
23 13  
24 14

25  
26 15 Email addresses:

27  
28 16 GCTB: thelma.glez.castro@gmail.com  
29 17

30 17 JRI: iselajua22@yahoo.com.mx  
31 18

32 18 GA: genis76@yahoo.com  
33 19

34 19 LNL: dralilialonar@yahoo.com.mx  
35 20

36 20 TZCA: alfonso\_tovillaz@yahoo.com.mx  
37 21

38 21 \*Corresponding author  
39 22  
40 22  
41 23

42 *\*Correspondence to: Dr. Carlos Alfonso Tovilla Zárate, Universidad Juárez*  
43 *Autónoma de Tabasco, División Académica Multidisciplinaria de Comalcalco,*  
44 *Ranchería Sur, Cuarta Sección, C.P. 86650, Comalcalco, Tabasco, México. Tel.*  
45 *52 9933581500 ext. 6901, e-mail: alfonso\_tovillaz@yahoo.com.mx*  
46 26  
47 27  
48 27  
49 28  
50 28  
51 28  
52  
53  
54  
55  
56  
57  
58  
59  
60



1

2 **Abstract**

3 **Introduction:** Suicide is an important public health problem and one of the most  
4 common causes of death throughout the world. Suicidal behavior is complex and  
5 has multi-factorial causes; case-control studies have reported an association  
6 between an alteration of the serotonin system and suicidal behavior; recently, the  
7 5-HTRC2 serotonin receptor gene has been suggested to be involved in its  
8 pathogenesis.

9 **Methods and analysis:** To evaluate the role of the 5-HTR2C gene in suicidal  
10 behavior, we will perform a systematic review and a meta-analysis of world wide  
11 reports that have investigated this association. This analysis will be reported  
12 following the Preferred Reporting Items for Systematic Reviews and Meta-  
13 Analyses (PRISMA) criteria. Studies deemed for inclusion in the systematic review  
14 will be scored for methodological quality using the Newcastle-Ottawa Assessment  
15 Scale (NOS). The inclusion criteria will be to present independent data, must be  
16 case-control studies, and be published in journal peer-reviews. To generate more  
17 accurate analyses, we will grade the reports using the GRADES scale procedures.

18 **Ethics and dissemination:** This study will describe the association between  
19 HTR2C gene and suicidal behavior. The results will be disseminated by a peer-  
20 reviewed publication and scientific presentations in Mexico and throughout the  
21 world.

22 **Protocol registration:** PROSPERO CRD42014009213

23

1  
2  
3 1  
4  
5 2  
6  
7  
8 3 Strengths and limitations of the study  
9  
10 4

- 11
- 12 • The results could improve the understanding of the genetic component of  
13 suicidal behavior.  
14
  - 15 • This study could show evidence of an association between the 5-HTR2C  
16 gene and suicidal behavior.  
17
  - 18 • We will perform an analysis by gender that could determine if the 5-HTR2C  
19 gene affects female and male differently.  
20
  - 21 • A small amount of reports (and therefore a small sample size) is a possible  
22 limitation.  
23
  - 24 • High heterogeneity among the reports could be a limitation.  
25  
26  
27  
28  
29  
30  
31  
32  
33  
34  
35  
36  
37  
38  
39  
40  
41  
42  
43  
44  
45  
46  
47  
48  
49  
50  
51  
52  
53  
54  
55  
56  
57  
58  
59  
60

1  
2  
3 1  
4  
5  
67 2 **Introduction**8  
9 3

10 4 Suicide is the act of taking one's own life voluntarily and intentionally. Suicidal  
11 behavior (SB) includes a wide spectrum of self-destructive actions that can be  
12 classified as 1) suicidal ideation (thoughts of ending one's own life, including  
13 planning a specific method to succeed), 2) attempted suicide or parasuicide (when  
14 an individual deliberately hurts himself but the act does not result in death) and 3)  
15 completed suicide (when the action ends the life of the person who carries it out).<sup>1-3</sup>

16 6 Suicide is a worldwide problem and it is increasing through time.<sup>4-6</sup> Social factors  
17 alone can not fully explain the suicidal behavior,<sup>7-9</sup> furthermore, some studies have  
18 found that there is a potential genetic component in it.<sup>1 10</sup>

19 8 The genetic studies that have tried to identify genes that predispose to suicidal  
20 behavior, have focused on genes that codify proteins involved in the serotonergic  
21 system, since this system interferes in controlling mood, emotions, aggression and  
22 anxiety, this again could influence suicidal behavior.<sup>11-13</sup> Recently, the 5HTR2C  
23 gene has been proposed to be related to suicidal behavior,<sup>10 14-17</sup> due to its  
24 association with other mental diseases such as schizophrenia,<sup>18-20</sup> bipolar  
25 disorder,<sup>21 22</sup> alcoholism,<sup>23</sup> and substance abuse.<sup>24</sup> Furthermore, the 5HTR2C gene  
26 has been associated with anxiety, mood disorders and impulsiveness, and these  
27 are important suicide risk factors.<sup>16 25</sup>

28 10 The HTR2C (5-HTR2C gene) is a serotonin 2C receptor that lies on the X  
29 chromosome, long arm, position Xq24-q28. It has five introns and six exons and so

1 far, is the only G-protein binding receptor known to alternative splicing the mRNA,  
2 therefore to have more protein isoforms.<sup>26</sup> It has a vast number of single nucleotide  
3 polymorphisms (SNPs). More of 1000 polymorphism have been identified along the  
4 gene (according to snpper.chip.org, October 2, 2013).<sup>27</sup> To date, the association  
5 between the HTR2C and suicidal behavioral remains controversial since the  
6 reports include positive and negative findings.<sup>28-32</sup> The figure 1 shows the HTR2C  
7 and suicide studies over time. Consequently, it is important to perform a deeper  
8 study assessing the possible connection between the HTR2C gene and suicidal  
9 behavior.

## 11 Aims and objectives

12 This study aims to systematically review and meta-analyze world wide reports that  
13 have researched for an association between the serotonin 2C receptor gene (5-  
14 HTR2C) and suicidal behavior. Particularly, it aims to focus on rs547536,  
15 rs2192372, rs4272555, rs24287207 and rs6318 polymorphisms in order to detect  
16 which ones act as a possible risk factor.

## 18 Methods/analysis

### 19 Systematic Review and Meta-analysis

20 This meta-analysis will be reported following the Preferred Reporting Items for  
21 Systematic Reviews and Meta-Analyses (PRISMA) criteria.<sup>33</sup>

## 1 Identification and selection of publications

2 For both, the systematic review and the meta-analysis, the literature will be  
3 searched from three databases: PubMed, Web of Science and EBSCO using the  
4 keywords: "HTR2C and suicidal behavior", "HTR2C and suicide". These words will  
5 be combined to retrieve the summaries.

6 Publications selected will meet the following criteria: (1) to be published in peer-  
7 reviewed journals, (2) to contain independent data, (3) to be case-control  
8 association studies in which the frequencies of three genotypes are clearly stated  
9 or could be calculated, (4) the use of healthy individuals or psychiatric patients  
10 without suicidal behavior as controls; (5) to include one or more of the three forms  
11 of suicidal behavior (suicidal ideation, attempted suicide or completed suicide); and  
12 (6) to be written in English. The procedure planned is exemplified on figure 2.

13 To determine inclusion, two researchers (González-Castro and Juárez-Rojop) will  
14 work independently screening each of the titles, abstracts and full texts. When the  
15 researchers disagree a third researcher (Tovilla-Zárate) will be consulted.

## 17 Data extraction

18 For the systematic review, the following data will be searched and analyzed:  
19 authors, year of publication, region, sample size, number of cases and controls,  
20 gender, age, psychiatric diagnosis, ethnical origin and finally, genotype and allele  
21 frequencies. The SNPs in study will be rs547536, rs2192372, rs4272555,

1 rs24287207 and rs6318.

2 The meta-analysis will be constructed following four categories: (a) exposed sick,  
3 (b) exposed not-sick, (c) not-exposed sick and (d) not- exposed not-sick. The “sick”  
4 term refers to subjects exhibiting suicidal behavior and the “exposed” term to the  
5 allele of risk.

6 The data extraction will be performed by González-Castro, Juárez-Rojop, Genis-  
7 Mendoza and López-Nárvaez.

## 8 **Data analysis**

9 The systematic review would be presented on tables comparing quality  
10 measurements and the data previously mentioned. Studies deemed for inclusion  
11 will be scored for methodological quality using the Newcastle-Ottawa Assessment  
12 Scale (NOS)<sup>34</sup>. A score of six will be considered as the cut-off point to distinguish  
13 higher from lower quality studies. To give more support to our analysis, we will  
14 consider the GRADES scale procedures (<http://www.gradeworkinggroup.org>).

15 For the meta-analysis we will use the EPIDAT 3.1 program (Software for  
16 Epidemiologic Analysis of Tabulated Data. Version 3.1. Pan American Health  
17 Organization; <http://dxsp.sergas.es>); this software is freely available for  
18 epidemiologic analysis of tabulated data. Data will be analyzed using the random-  
19 effects model following the reports in literature<sup>35-37</sup>. The sample heterogeneity will  
20 be measured with the Dersimonian and Laird’s Q test; we will also use graphs to  
21 help visualize those studies favoring heterogeneity. The results of the meta-  
22 analysis will be expressed as odds ratios (ORs). Pooled ORs will be calculated for

1  
2  
3 1 each model used, viz.: allelic (Example: A vs. C), additive (AA vs. CC), dominant  
4  
5 2 (AA + AC vs. CC), and recessive (AA vs. AC + CC). Since the HTR2C gene is  
6  
7  
8 3 located on the X chromosome, an analysis by gender will be performed. To  
9  
10 4 address the publication bias, the Egger's test and funnel plots will be calculated  
11  
12 5 with the EPIDAT 3.1 software. This plotting will standardize the effect of each study  
13  
14 6 on the vertical axis and its correspondent precision on the horizontal axis.  
15  
16  
17 7 Sensibility analysis will be performed. The influence of each study in the global  
18  
19 8 estimation will be analyzed and graphed. The direction of the effect will be  
20  
21 9 analyzed. To evaluate genotype distribution and calculate the Hardy-Weinberg  
22  
23 10 equilibrium, we will use a chi-squared ( $\chi^2$ ) analysis. Regarding the presence of  
24  
25 11 Hardy-Weinberg equilibrium, we will use the Pearson's chi-squared test to assess  
26  
27 12 goodness of fit. Finally, the Haploview 4.2<sup>38</sup> will be used to calculate the linkage  
28  
29 13 disequilibrium (LD) of the markers.  
30  
31  
32  
33  
34

35 14 The analyzed of dates will be performed by Gonzalez-Castro and Tovilla-Zarate-  
36  
37 15 Differences in the interpretation could be resolved by López-Narvaez.  
38  
39  
40  
41  
42  
43

## 44 17 Discussion

45  
46  
47 18 Suicide is a public health problem that affects entire communities and not only the  
48  
49 19 suicidal person. The medical costs and lost wages associated with suicide also  
50  
51 20 take their toll on the community. Therefore, it is crucial to better understand the  
52  
53 21 etiology of suicidal behavior, as well as knowing how big the problem is and whom  
54  
55 22 it affects.  
56  
57  
58  
59  
60

1 Literature suggests that there could be a genetic factor linked to suicide. Some  
2 studies have proposed a hypothetical explanation using the Stress-Diathesis Model  
3 and have observed that people who have had suicidal behavior are more likely to  
4 have a family history of suicide.<sup>16</sup> Therefore we can suggest that a genetic  
5 component could contribute to suicidal tendencies.<sup>16</sup> The serotonin  
6 neurotransmission system has received the most consideration as candidate  
7 genes in suicidal behavior, since the serotonin system regulates mood,  
8 impulsiveness and anxiety which are important suicide risk factors. Furthermore,  
9 the serotonergic function is clearly altered in suicide victims.<sup>10</sup> Among the most  
10 studied genes, are the ones that codify to the tryptophan hydroxylase 1 and 2  
11 (TPH-1 and TPH-2), serotonin transporter (5-HTT or SLC6A4) and the serotonin  
12 receptors (5-HTR1A, 5-HTR1B, 5-HTR2A, 5-HTR2C, etc)<sup>39</sup>. Being the last one the  
13 most recently suggested around the world to be associated with suicidal behavior  
14 Figure 3. The gene 5-HTR2C needs a deeper analysis Performing a systematic  
15 review and a meta-analysis, this protocol could improve the understanding of the  
16 genetic component in suicidal behavior; regarding the data analysis, we will adopt  
17 the random effects model, because it accounts for additional sources of inter-study  
18 variation when heterogeneity exists and has a more reliable outcome.

19 This meta-analysis could present some limitations. First, the association between  
20 HTR2C and suicidal behavior is not widely studied; therefore, we might not find a  
21 sufficient amount of reports to analyze; furthermore, we are focusing on five  
22 polymorphisms and perhaps there are not enough reports of each one. Secondly,  
23 the reports will be limited to English language so the number of studies might be



1 too small. High heterogeneity due to differences in age, ethnicity, gender,  
2 education, wealth, etc. These limitations will decrease the statistical power of the  
3 study o reliability of our results.

4 Conversely, it would be the first meta-analysis associating between five SNPs of  
5 HTR2C and suicidal behavior with allelic, additive, dominant, and recessive  
6 models. In addition, this study protocol could demonstrate the link between the 5-  
7 HTR2C in the suicidal behavior of the general population.

8 Performing an analysis by gender is a strong point; in theory, due to its  
9 chromosomal location (X chromosome), this gene must affect females and males  
10 differently. The results could help to determine if the HTR2C gene is a risk factor in  
11 developing suicidal behavior. Indirectly, our study could help to understand the  
12 etiology of suicidal behavior.

13  
14 **Ethics and dissemination:** This study will describe the association between  
15 HTR2C gene and suicidal behavior. The results of this study will be disseminated  
16 by peer-reviewed publication and scientific presentations in Mexico and throughout  
17 the world.

## 18 19 20 **References**

- 21 1. Antypa N, Serretti A, Rujescu D. Serotonergic genes and suicide: a systematic review. European  
22 neuropsychopharmacology : the journal of the European College of  
23 Neuropsychopharmacology 2013;23:1125-42 doi:  
24 10.1016/j.euroneuro.2013.03.013published Online First: Epub Date]] .

- 1 2. Pooley EC, Houston K, Hawton K, Harrison PJ. Deliberate self-harm is associated with allelic  
2 variation in the tryptophan hydroxylase gene (TPH A779C), but not with polymorphisms in  
3 five other serotonergic genes. *Psychological medicine* 2003;33:775-83
- 4 3. Serretti A, Calati R, Giegling I, Hartmann AM, Moller HJ, Rujescu D. Serotonin receptor HTR1A  
5 and HTR2C variants and personality traits in suicide attempters and controls. *Journal of*  
6 *psychiatric research* 2009;43:519-25 doi: 10.1016/j.jpsychires.2008.06.005published  
7 Online First: Epub Date]].
- 8 4. Brzozowski FS, Soares GB, Benedet J, Boing AF, Peres MA. Suicide time trends in Brazil from  
9 1980 to 2005. *Cadernos de saude publica* 2010;26:1293-302
- 10 5. Jagodic HK, Agius M, Pregelj P. Inter-regional variations in suicide rates. *Psychiatria Danubina*  
11 2012;24 Suppl 1:S82-5
- 12 6. Varnik P. Suicide in the world. *International journal of environmental research and public health*  
13 2012;9:760-71 doi: 10.3390/ijerph9030760published Online First: Epub Date]].
- 14 7. Bani-Fatemi A, Polsinelli G, Kennedy JL, De Luca V. Ethnicity and suicide attempt: analysis in  
15 bipolar disorder and schizophrenia. *BMC psychiatry* 2013;13:252 doi: 10.1186/1471-244x-  
16 13-252published Online First: Epub Date]].
- 17 8. Shinozaki G, Romanowicz M, Mrazek DA, Kung S. HTR2A gene-child abuse interaction and  
18 association with a history of suicide attempt among Caucasian depressed psychiatric  
19 inpatients. *Journal of affective disorders* 2013;150:1200-3 doi:  
20 10.1016/j.jad.2013.05.028published Online First: Epub Date]].
- 21 9. Choo C, Diederich J, Song I, Ho R. Cluster analysis reveals risk factors for repeated suicide  
22 attempts in a multi-ethnic Asian population. *Asian J Psychiatr* 2014;8:38-42 doi:  
23 10.1016/j.ajp.2013.10.001published Online First: Epub Date]].
- 24 10. Sadkowski M, Dennis B, Clayden RC, et al. The role of the serotonergic system in suicidal  
25 behavior. *Neuropsychiatric disease and treatment* 2013;9:1699-716 doi:  
26 10.2147/ndt.s50300published Online First: Epub Date]].
- 27 11. Tovilla-Zarate CA, Gonzalez-Castro TB, Juarez-Rojop I, et al. Study on genes of the serotonergic  
28 system and suicidal behavior: protocol for a case-control study in Mexican population.  
29 *BMC psychiatry* 2014;14:29 doi: 10.1186/1471-244x-14-29published Online First: Epub  
30 Date]].
- 31 12. Mandelli L, Serretti A. Gene environment interaction studies in depression and suicidal  
32 behavior: An update. *Neuroscience and biobehavioral reviews* 2013;37:2375-97 doi:  
33 10.1016/j.neubiorev.2013.07.011published Online First: Epub Date]].
- 34 13. Dracheva S, Patel N, Woo DA, Marcus SM, Siever LJ, Haroutunian V. Increased serotonin 2C  
35 receptor mRNA editing: a possible risk factor for suicide. *Molecular psychiatry*  
36 2008;13:1001-10 doi: 10.1038/sj.mp.4002081published Online First: Epub Date]].
- 37 14. Serretti A, Mandelli L, Giegling I, et al. HTR2C and HTR1A gene variants in German and Italian  
38 suicide attempters and completers. *American journal of medical genetics. Part B,*  
39 *Neuropsychiatric genetics : the official publication of the International Society of*  
40 *Psychiatric Genetics* 2007;144b:291-9 doi: 10.1002/ajmg.b.30432published Online First:  
41 Epub Date]].
- 42 15. Cavarec L, Vincent L, Le Borgne C, et al. In vitro screening for drug-induced depression and/or  
43 suicidal adverse effects: a new toxicogenomic assay based on CE-SSCP analysis of HTR2C  
44 mRNA editing in SH-SY5Y cells. *Neurotoxicity research* 2013;23:49-62 doi:  
45 10.1007/s12640-012-9324-9published Online First: Epub Date]].
- 46 16. Mann JJ. The serotonergic system in mood disorders and suicidal behaviour. *Philosophical*  
47 *transactions of the Royal Society of London. Series B, Biological sciences*  
48 2013;368:20120537 doi: 10.1098/rstb.2012.0537published Online First: Epub Date]].

- 1 17. Iwamoto K, Kato T. RNA editing of serotonin 2C receptor in human postmortem brains of major  
2 mental disorders. *Neurosci Lett* 2003;346:169-72
- 3 18. Castensson A, Aberg K, McCarthy S, Saetre P, Andersson B, Jazin E. Serotonin receptor 2C  
4 (HTR2C) and schizophrenia: examination of possible medication and genetic influences on  
5 expression levels. *American journal of medical genetics. Part B, Neuropsychiatric genetics :*  
6 *the official publication of the International Society of Psychiatric Genetics* 2005;134b:84-9  
7 doi: 10.1002/ajmg.b.30151published Online First: Epub Date]].
- 8 19. Castensson A, Emilsson L, Sundberg R, Jazin E. Decrease of serotonin receptor 2C in  
9 schizophrenia brains identified by high-resolution mRNA expression analysis. *Biological*  
10 *psychiatry* 2003;54:1212-21
- 11 20. Thompson A, Lavedan C, Volpi S. Absence of weight gain association with the HTR2C -759C/T  
12 polymorphism in patients with schizophrenia treated with iloperidone. *Psychiatry research*  
13 2010;175:271-3 doi: 10.1016/j.psychres.2009.03.020published Online First: Epub Date]].
- 14 21. Manchia M, Zai CC, Squassina A, Vincent JB, De Luca V, Kennedy JL. Mixture regression analysis  
15 on age at onset in bipolar disorder patients: investigation of the role of serotonergic  
16 genes. *European neuropsychopharmacology : the journal of the European College of*  
17 *Neuropsychopharmacology* 2010;20:663-70 doi:  
18 10.1016/j.euroneuro.2010.04.001published Online First: Epub Date]].
- 19 22. Oruc L, Verheyen GR, Furac I, et al. Association analysis of the 5-HT2C receptor and 5-HT  
20 transporter genes in bipolar disorder. *American journal of medical genetics* 1997;74:504-6
- 21 23. Himei A, Kono Y, Yoneda H, et al. An association study between alcoholism and the  
22 serotonergic receptor genes. *Alcoholism, clinical and experimental research* 2000;24:341-2
- 23 24. Herman AI, Balogh KN. Polymorphisms of the serotonin transporter and receptor genes:  
24 susceptibility to substance abuse. *Substance abuse and rehabilitation* 2012;3:49-57 doi:  
25 10.2147/sar.s25864published Online First: Epub Date]].
- 26 25. Bortolato M, Pivac N, Muck Seler D, Nikolac Perkovic M, Pessia M, Di Giovanni G. The role of  
27 the serotonergic system at the interface of aggression and suicide. *Neuroscience*  
28 2013;236:160-85 doi: 10.1016/j.neuroscience.2013.01.015published Online First: Epub  
29 Date]].
- 30 26. De Luca V, Tharmaligam S, Strauss J, Kennedy JL. 5-HT2C receptor and MAO-A interaction  
31 analysis: no association with suicidal behaviour in bipolar patients. *European archives of*  
32 *psychiatry and clinical neuroscience* 2008;258:428-33 doi: 10.1007/s00406-008-0815-  
33 xpublished Online First: Epub Date]].
- 34 27. Riva A, Kohane IS. A SNP-centric database for the investigation of the human genome. *BMC*  
35 *bioinformatics* 2004;5:33 doi: 10.1186/1471-2105-5-33published Online First: Epub  
36 Date]].
- 37 28. Judy JT, Seifuddin F, Mahon PB, et al. Association study of serotonin pathway genes in  
38 attempted suicide. *Am J Med Genet B Neuropsychiatr Genet* 2012;1:112-9
- 39 29. Videtic A, Peternelj TT, Zupanc T, Balazic J, Komel R. Promoter and functional polymorphisms  
40 of HTR2C and suicide victims. *Genes Brain Behav* 2009;8:541-5
- 41 30. Zhang J, Shen Y, He G, et al. Lack of association between three serotonin genes and suicidal  
42 behavior in Chinese psychiatric patients. *Prog Neuropsychopharmacol Biol Psychiatry*  
43 2008;32:467-71
- 44 31. Turecki G, Sequeira A, Gingras Y, et al. Suicide and serotonin: study of variation at seven  
45 serotonin receptor genes in suicide completers. *Am J Med Genet B Neuropsychiatr Genet*  
46 2003;1:36-40

- 1  
2  
3 1 32. Stefulj J, Buttner A, Kubat M, et al. 5HT-2C receptor polymorphism in suicide victims.  
4 2 Association studies in German and Slavic populations. *Eur Arch Psychiatry Clin Neurosci*  
5 3 2004;254:224-7  
6 4  
7 4 33. Swartz MK. *The PRISMA statement: a guideline for systematic reviews and meta-analyses*: J  
8 5 *Pediatr Health Care*. 2011 Jan-Feb;25(1):1-2. doi: 10.1016/j.pedhc.2010.09.006.  
9 6  
10 6 34. Stang A. Critical evaluation of the Newcastle-Ottawa scale for the assessment of the quality of  
11 7 nonrandomized studies in meta-analyses. *Eur J Epidemiol* 2010;25:603-5  
12 8  
13 8 35. Gonzalez-Castro TB, Tovilla-Zarate C, Juarez-Rojop I, et al. Association of the 5HTR2A gene with  
14 9 suicidal behavior: case-control study and updated meta-analysis. *BMC Psychiatry*  
15 10 2013;13:13-25  
16 11  
17 11 36. Gonzalez-Castro TB, Tovilla-Zarate CA. Meta-analysis: A tool for clinical and experimental  
18 12 research in psychiatry. *Nord J Psychiatry* 2013;17:17  
19 13  
20 13 37. Gonzalez-Castro TB, Tovilla-Zarate CA, Juarez-Rojop I, et al. Association of 5HTR1A gene  
21 14 variants with suicidal behavior: case-control study and updated meta-analysis. *J Psychiatr*  
22 15 *Res* 2013;47:1665-72  
23 16  
24 16 38. Barrett JC, Fry B, Maller J, Daly MJ. Haploview: analysis and visualization of LD and haplotype  
25 17 maps. *Bioinformatics* 2005;21:263-5 doi: 10.1093/bioinformatics/bth457published Online  
26 18 First: Epub Date]].  
27 19  
28 19 39. Pandey GN. Biological basis of suicide and suicidal behavior. *Bipolar Disord* 2013;15:524-41  
29 20  
30 21  
31  
32  
33  
34  
35  
36  
37  
38  
39  
40  
41  
42  
43  
44  
45  
46  
47  
48  
49  
50  
51  
52  
53  
54  
55  
56  
57  
58  
59  
60

1

**2 Author's contribution:**

3 TZCA and GCTB conceived the study, participated in the design and helped to  
4 draft the manuscript. GA, JRI and LNML helped on the selection of genes and  
5 polymorphisms to study. TZCA, GCTB and A wrote the manuscript. All authors  
6 read, critically revised and approved the final version of the manuscript.

7

**8 Funding statement:**

9 This research received no specific grant from any funding.

**10 Competing interests statement:**

11 The authors declare not to have any competing interests.

12

1

2 **Figure legends**

3 Figure 1

4 Representation of 5-HTR2C gene studies over time. (All data from:  
5 [www.gopubmed.com](http://www.gopubmed.com))

6 **Figure 2.**

7 Flow-chart for the search strategy and the inclusion/exclusion criteria to be used in  
8 the meta-analysis and systematic review.

9

10 Figure 3

11 World map of Genetic association studies of 5-HTR2C with suicidal behavior (All  
12 data from: [www.gopubmed.com](http://www.gopubmed.com))

13

1  
2  
3  
4  
5  
6  
7  
8  
9  
10  
11  
12  
13  
14  
15  
16  
17  
18  
19  
20  
21  
22  
23  
24  
25  
26  
27  
28  
29  
30  
31  
32  
33  
34  
35  
36  
37  
38  
39  
40  
41  
42  
43  
44  
45  
46  
47  
48  
49  
50  
51  
52  
53  
54  
55  
56  
57  
58  
59  
60

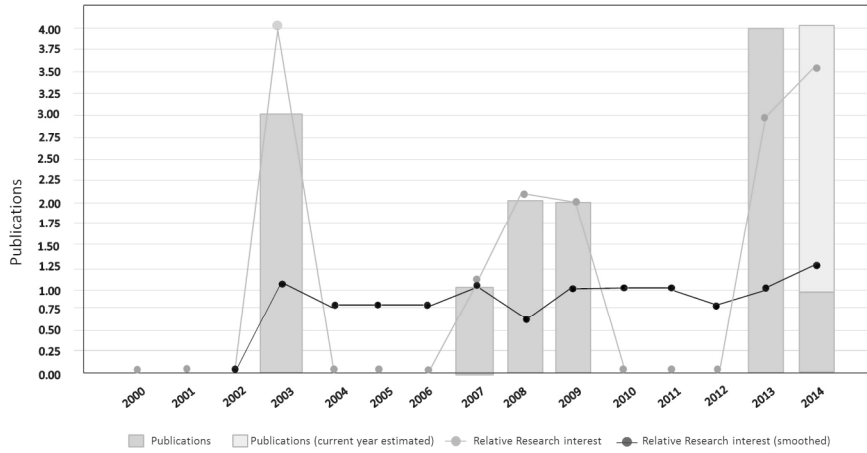

Distribution of association studies on the 5-HTR2C gene and suicidal behaviour published in PubMed by year (figure adapted from the results of GoPubMed®).  
202x110mm (300 x 300 DPI)

review only

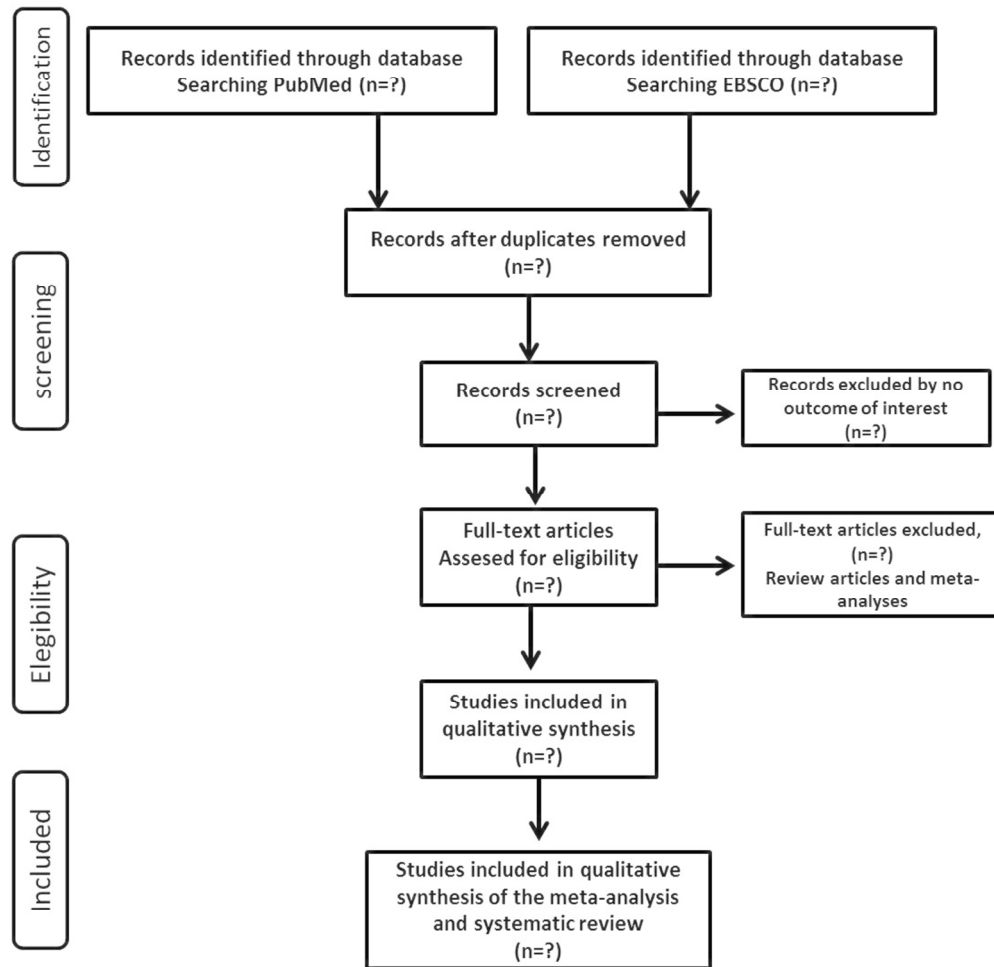

Flow-chart for the search strategy and the inclusion/exclusion criteria used in the meta-analysis and systematic review.  
93x97mm (300 x 300 DPI)

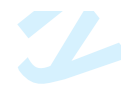



1  
2  
3  
4  
5  
6  
7  
8  
9  
10  
11  
12  
13  
14  
15  
16  
17  
18  
19  
20  
21  
22  
23  
24  
25  
26  
27  
28  
29  
30  
31  
32  
33  
34  
35  
36  
37  
38  
39  
40  
41  
42  
43  
44  
45  
46  
47  
48  
49  
50  
51  
52  
53  
54  
55  
56  
57  
58  
59  
60

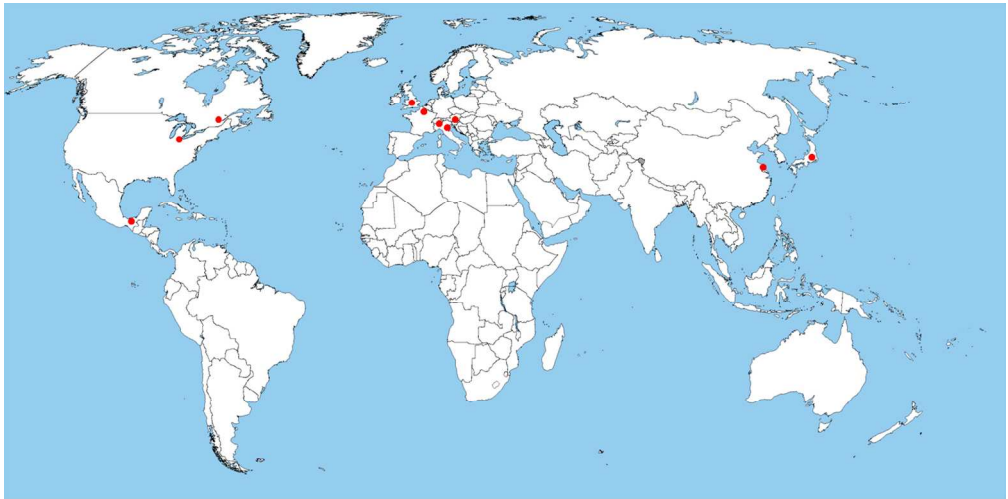

World map of genetic association studies of the 5-HTT2C gene with suicidal behaviour (figure adapted from the results of GoPubMed®).

er review only

# BMJ Open

## Association between HTR2C gene variants and suicidal behaviour: A protocol for the systematic review and meta-analysis of genetic studies

|                                 |                                                                                                                                                                                                                                                                                                                                                                                                                                                                                                                                                                                        |
|---------------------------------|----------------------------------------------------------------------------------------------------------------------------------------------------------------------------------------------------------------------------------------------------------------------------------------------------------------------------------------------------------------------------------------------------------------------------------------------------------------------------------------------------------------------------------------------------------------------------------------|
| Journal:                        | <i>BMJ Open</i>                                                                                                                                                                                                                                                                                                                                                                                                                                                                                                                                                                        |
| Manuscript ID:                  | bmjopen-2014-005423.R2                                                                                                                                                                                                                                                                                                                                                                                                                                                                                                                                                                 |
| Article Type:                   | Protocol                                                                                                                                                                                                                                                                                                                                                                                                                                                                                                                                                                               |
| Date Submitted by the Author:   | 19-Aug-2014                                                                                                                                                                                                                                                                                                                                                                                                                                                                                                                                                                            |
| Complete List of Authors:       | González-Castro, Thelma; Universidad Juárez Autónoma de Tabasco, División Académica de Ciencias de la Salud Juárez-Rojop, Isela; Universidad Juárez Autónoma de Tabasco, División Académica de Ciencias de la Salud Genis-Mendoza, Alma; Instituto de Medicina Genómica (INMEGEN), Servicios de Atención Psiquiátrica (SAP), Secretaría de Salud López-Narváez, María; Hospital General de Yajalon, Secretaría de Salud Tovilla-Zárate, Carlos; Universidad Juárez Autónoma de Tabasco, División Multidisciplinaria de Comalcalco, División Académica Multidisciplinaria de Comalcalco |
| <b>Primary Subject Heading</b>: | Mental health                                                                                                                                                                                                                                                                                                                                                                                                                                                                                                                                                                          |
| Secondary Subject Heading:      | Mental health                                                                                                                                                                                                                                                                                                                                                                                                                                                                                                                                                                          |
| Keywords:                       | PSYCHIATRY, Suicide & self-harm < PSYCHIATRY, STATISTICS & RESEARCH METHODS                                                                                                                                                                                                                                                                                                                                                                                                                                                                                                            |
|                                 |                                                                                                                                                                                                                                                                                                                                                                                                                                                                                                                                                                                        |

SCHOLARONE™  
Manuscripts

1  
2  
3 1  
4 2  
5  
6 3 **Association between HTR2C gene variants and suicidal behaviour: A**  
7 4 **protocol for the systematic review and meta-analysis of genetic studies**  
8  
9 5

10  
11 6 González-Castro Thelma Beatriz<sup>1</sup>, Juárez-Rojop Isela<sup>1</sup>, Genis Alma<sup>2</sup>, López-  
12 7 Narváez María Lilia<sup>3</sup> Tovilla-Zárte Carlos Alfonso<sup>4</sup> \*

14  
15 8 <sup>1</sup>Universidad Juárez Autónoma de Tabasco, División Académica de Ciencias de la  
16 9 Salud, Villahermosa, Tabasco, México.

17  
18 10 <sup>2</sup> Instituto Nacional de Medicina Genómica (INMEGEN), Servicios de Atención  
19 11 Psiquiátrica (SAP), Secretaría de Salud. México, D. F., México.

20  
21 12 <sup>3</sup> Hospital General de Yajalón. Secretaria de Salud, Yajalón, Chiapas, México.

22  
23 13 <sup>4</sup> Universidad Juárez Autónoma de Tabasco, División Académica Multidisciplinaria  
24 14 de Comalcalco, Comalcalco, Tabasco, México.  
25  
26  
27  
28

29 17 Email addresses:

30  
31 18 GCTB: [thelma.glez.castro@gmail.com](mailto:thelma.glez.castro@gmail.com)

32  
33 19 JRI: [iselajua22@yahoo.com.mx](mailto:iselajua22@yahoo.com.mx)

34  
35 20 GA: [genis76@yahoo.com](mailto:genis76@yahoo.com)

36  
37 21 LNL: [dralilialonar@yahoo.com.mx](mailto:dralilialonar@yahoo.com.mx)

38  
39 22 TZCA: [alfonso\\_tovillaz@yahoo.com.mx](mailto:alfonso_tovillaz@yahoo.com.mx)

40  
41 23 \*Corresponding author  
42  
43  
44

45 25 *\*Correspondence to: Dr. Carlos Alfonso Tovilla Zárte, Universidad Juárez*  
46 26 *Autónoma de Tabasco, División Académica Multidisciplinaria de Comalcalco,*  
47 27 *Ranchería Sur, Cuarta Sección, C.P. 86650, Comalcalco, Tabasco, México. Tel.*  
48 28 *52 9933581500 ext. 6901, e-mail: [alfonso\\_tovillaz@yahoo.com.mx](mailto:alfonso_tovillaz@yahoo.com.mx)*  
49  
50  
51  
52  
53  
54  
55  
56  
57  
58  
59  
60

1

**Abstract**

**Introduction:** Suicide is an important public health problem and one of the most common causes of death throughout the world. Suicidal behaviour is complex, and its causes are multi-factorial. Case-control studies have reported an association between an alteration of the serotonin system and suicidal behaviour. Recently, it has been suggested that the 5-HT<sub>2C</sub> serotonin receptor gene is involved in the pathogenesis of suicidal behaviour.

**Methods and analysis:** To evaluate the role of the 5-HT<sub>2C</sub> gene in suicidal behaviour, we will perform a systematic review and a meta-analysis of worldwide reports that have investigated the association between the serotonin system and suicidal behaviour. This analysis will be reported following the Preferred Reporting Items for Systematic Reviews and Meta-Analyses (PRISMA) criteria. Studies deemed for inclusion in the systematic review will be scored for methodological quality using the Newcastle-Ottawa Assessment Scale (NOS). The inclusion criteria will be to present independent data, to be case-control studies, and to be published in journal peer-reviews. To generate more accurate analyses, we will grade the reports using the GRADES scale procedures.

**Ethics and dissemination:** This study will describe the association between the HTR<sub>2C</sub> gene and suicidal behaviour. The results will be reported in a peer-reviewed publication and in scientific presentations in Mexico and throughout the world.

**Protocol registration:** PROSPERO CRD42014009213

24

1  
2  
3  
4  
5  
6  
7  
8  
9  
10  
11  
12  
13  
14  
15  
16  
17  
18  
19  
20  
21  
22  
23  
24  
25  
26  
27  
28  
29  
30  
31  
32  
33  
34  
35  
36  
37  
38  
39  
40  
41  
42  
43  
44  
45  
46  
47  
48  
49  
50  
51  
52  
53  
54  
55  
56  
57  
58  
59  
60

1  
2  
3  
4  
5  
6  
7  
8  
9  
10  
11  
12  
13  
14  
15  
16  
17  
18  
19  
20  
21  
22  
23  
24  
25  
26  
27  
28  
29  
30  
31  
32  
33  
34  
35  
36  
37  
38  
39  
40  
41  
42  
43  
44  
45  
46  
47  
48  
49  
50  
51  
52  
53  
54  
55  
56  
57  
58  
59  
60

### Strengths and limitations of the study

- The results could improve the understanding of the genetic component of suicidal behaviour.
- This study could show evidence of an association between the 5-HTR2C gene and suicidal behaviour.
- We will perform an analysis by gender that could determine if the 5-HTR2C gene affects females and males differently.
- A small number of reports (and therefore a small sample size) is a possible limitation.
- High heterogeneity among the reports could be a limitation.

1

## 2 Introduction

3

4 Suicide is the act of taking one's own life voluntarily and intentionally. Suicidal  
5 behaviour (SB) includes a wide spectrum of self-destructive actions that can be  
6 classified as: 1) suicidal ideation (thoughts of ending one's own life, including  
7 planning a specific method to succeed), 2) attempted suicide or parasuicide (when  
8 an individual deliberately hurts himself but the act does not result in death) and 3)  
9 completed suicide (when the action ends the life of the person who carries it out).<sup>1-3</sup>

10 Suicide is a worldwide problem, and its prevalence has been increasing over  
11 time.<sup>4-6</sup> Social factors alone cannot fully explain suicidal behaviour.<sup>7-9</sup> Furthermore,  
12 some studies have found that there is a potential genetic component linked to  
13 suicidal behaviour.<sup>1 10</sup>

14 The genetic studies that have tried to identify genes that predispose certain  
15 individuals to suicidal behaviour have focused on genes that codify the proteins  
16 involved in the serotonergic system because this system interferes with the  
17 control of mood, emotions, aggression and anxiety, all of which could influence  
18 suicidal behaviour.<sup>11-13</sup> Recently, it has been proposed that the 5-HTR2C gene is  
19 related to suicidal behaviour<sup>10 14-17</sup> due to its association with other mental diseases  
20 such as schizophrenia,<sup>18-20</sup> bipolar disorder,<sup>21 22</sup> alcoholism,<sup>23</sup> and substance  
21 abuse.<sup>24</sup> Furthermore, the 5-HTR2C gene has been associated with anxiety, mood  
22 disorders and impulsiveness, and these are important suicide risk factors.<sup>16 25</sup>

1  
2  
3 1 HTR2C (the 5-HTR2C gene) is a serotonin 2C receptor that lies on the X  
4  
5 2 chromosome on the long arm at position Xq24-q28. HTR2C has five introns and six  
6  
7  
8 3 exons, and so far, it is the only G-protein binding receptor known to undergo  
9  
10 4 alternative splicing of the mRNA, resulting in more protein isoforms.<sup>26</sup> HTR2C has  
11  
12 5 a vast number of single nucleotide polymorphisms (SNPs). More than 1000  
13  
14 6 polymorphism have been identified along the gene (according to snpper.chip.org,  
15  
16 7 October 2, 2013).<sup>27</sup> To date, the association between HTR2C and suicidal  
17  
18 8 behaviour remains controversial because the reports include both positive and  
19  
20 9 negative findings.<sup>28-32</sup> Figure 1 shows the distribution of HTR2C and suicide  
21  
22 10 studies over time. Consequently, it is important to perform a deeper study  
23  
24 11 assessing the possible connection between the 5-HTR2C gene and suicidal  
25  
26 12 behaviour.  
27  
28  
29  
30  
31  
32  
33  
34

### 35 14 **Aims and objectives**

36  
37  
38 15 This study aims to systematically review and perform a meta-analysis on the  
39  
40 16 worldwide reports that have investigated an association between the serotonin 2C  
41  
42 17 receptor gene (5-HTR2C) and suicidal behaviour. Particularly, it aims to focus on  
43  
44 18 rs547536, rs2192372, rs4272555, rs24287207 and rs6318 polymorphisms to  
45  
46 19 detect which ones act as possible risk factors.  
47  
48  
49  
50  
51  
52

### 53 21 **Methods/analysis**

### 54 55 56 22 **Systematic Review and Meta-analysis** 57 58 59 60

1  
2  
3 1 This meta-analysis will be reported following the Preferred Reporting Items for  
4  
5 2 Systematic Reviews and Meta-Analyses (PRISMA) criteria.<sup>33</sup>  
6  
7

### 8 9 **Identification and selection of publications**

10  
11  
12 4 For both the systematic review and the meta-analysis, the literature will be  
13  
14 5 searched from three databases—PubMed, Web of Science and EBSCO—using  
15  
16 6 the following keywords: “HTR2C and suicidal behaviour” and “HTR2C and suicide”.  
17  
18  
19 7 These words will be combined to retrieve the summaries.  
20  
21

22  
23 8 The selected publications will meet the following criteria: (1) to be published in  
24  
25 9 peer-reviewed journals, (2) to contain independent data, (3) to be case-control  
26  
27 10 association studies in which the frequencies of the three genotypes are clearly  
28  
29 11 stated or could be calculated, (4) to use healthy individuals or psychiatric patients  
30  
31 12 without suicidal behaviour as controls, (5) to include one or more of the three forms  
32  
33 13 of suicidal behaviour (suicidal ideation, attempted suicide or completed suicide),  
34  
35 14 and (6) to be written in English. The planned procedure is illustrated in Figure 2.  
36  
37  
38

39  
40 15 To determine inclusion, two researchers (González-Castro and Juárez-Rojop) will  
41  
42 16 work independently to screen each of the titles, abstracts and full texts. When the  
43  
44 17 researchers disagree a third researcher (Tovilla-Zárate) will be consulted.  
45  
46  
47

48  
49

### 50 51 **Data extraction**

52  
53  
54 20 For the systematic review, the following data will be searched and analysed:  
55  
56 21 authors, year of publication, region, sample size, number of cases and controls,  
57  
58  
59  
60



1 gender, age, psychiatric diagnosis, ethnical origin and finally, genotype and allele  
2 frequencies. The SNPs in the study will be rs547536, rs2192372, rs4272555,  
3 rs24287207 and rs6318.

4 The meta-analysis will be constructed following four categories: (a) exposed sick,  
5 (b) exposed not-sick, (c) not-exposed sick and (d) not- exposed not-sick. The term  
6 “sick” refers to subjects exhibiting suicidal behaviour and the term “exposed” refers  
7 to the allele of risk.

8 The data extraction will be performed by González-Castro, Juárez-Rojop, Genis-  
9 Mendoza and López-Nárvaez.

## 10 **Data analysis**

11 The systematic review will be presented in tables comparing quality measurements  
12 and the data previously mentioned. Studies deemed for inclusion will be scored for  
13 methodological quality using the Newcastle-Ottawa Assessment Scale (NOS).<sup>34</sup> A  
14 score of six will be considered the cut-off point to distinguish higher from lower  
15 quality studies. To give more support to our analysis, we will consider the GRADES  
16 scale procedures (<http://www.gradeworkinggroup.org>).

17 For the meta-analysis, we will use the EPIDAT 3.1 program (Software for  
18 Epidemiologic Analysis of Tabulated Data, Version 3.1., Pan American Health  
19 Organization; <http://dxsp.sergas.es>); this software is freely available for the  
20 epidemiologic analysis of tabulated data. Data will be analysed using the random-  
21 effects model following the reports in the literature.<sup>35-37</sup> The sample heterogeneity  
22 will be measured using the Dersimonian and Laird’s Q test; we will also use graphs

1 to help visualise those studies favouring heterogeneity. The results of the meta-  
2 analysis will be expressed as odds ratios (ORs). Pooled ORs will be calculated for  
3 each model used: viz.: allelic (Example: A vs. C), additive (AA vs. CC), dominant  
4 (AA + AC vs. CC), and recessive (AA vs. AC + CC). Because the HTR2C is  
5 located on the X chromosome, an analysis by gender will be performed. To  
6 address the publication bias, the Egger's test and funnel plots will be calculated  
7 with the EPIDAT 3.1 software. This plotting will standardize the effect of each study  
8 on the vertical axis and its correspondent precision on the horizontal axis.  
9 Sensibility analysis will be performed. The influence of each study in the global  
10 estimation will be analysed and graphed. The direction of the effect will be  
11 analysed. To evaluate genotype distribution and calculate the Hardy-Weinberg  
12 equilibrium, we will use a chi-squared ( $\chi^2$ ) analysis. Regarding the presence of  
13 Hardy-Weinberg equilibrium, we will use the Pearson's chi-squared test to assess  
14 goodness of fit. Finally, the Haploview 4.2<sup>38</sup> will be used to calculate the linkage  
15 disequilibrium (LD) of the markers.

16 The analysed of dates will be performed by Gonzalez-Castro and Tovilla-Zarate-  
17 Any differences in the interpretation will be resolved by López-Narvaez.

## 19 Discussion

20 Suicide is a public health problem that affects entire communities and not just the  
21 suicidal person. The medical costs and lost wages associated with suicide also  
22 take their toll on the community. Therefore, it is crucial to better understand the

1 aetiology of suicidal behaviour as well as define how large the problem is and  
2 whom it affects.

3 The literature suggests that there could be a genetic factor linked to suicide. Some  
4 studies have proposed a hypothetical explanation using the Stress-Diathesis Model  
5 and have observed that people who exhibit suicidal behaviour are more likely to  
6 have a family history of suicide.<sup>16</sup> Therefore, this finding suggests that a genetic  
7 component could contribute to suicidal tendencies.<sup>16</sup> The serotonin  
8 neurotransmission system has received the most consideration as the candidate  
9 genes linked to suicidal behaviour because the serotonin system regulates mood,  
10 impulsiveness and anxiety, which are important suicide risk factors. Furthermore,  
11 the serotonergic function is clearly altered in suicide victims.<sup>10</sup> Among the most  
12 studied genes are the ones that codify tryptophan hydroxylase 1 and 2 (TPH-1 and  
13 TPH-2), the serotonin transporter (5-HTT or SLC6A4) and the serotonin receptors  
14 (5-HTR1A, 5-HTR1B, 5-HTR2A, 5-HTR2C, etc.).<sup>39</sup> Figure 3 summarizes the  
15 worldwide studies linking suicidal behaviour with HTR2C, the gene most recently  
16 highlighted in the literature in association with suicidal behaviour. The 5-HTR2C  
17 gene requires a deeper analysis; therefore, by performing a systematic review and  
18 a meta-analysis, this protocol could improve the understanding of the genetic  
19 component in suicidal behaviour. Regarding the data analysis, we will adopt the  
20 random effects model because it accounts for additional sources of inter-study  
21 variation when heterogeneity exists and thus has a more reliable outcome.

22 This meta-analysis could present some limitations. First, the association between  
23 HTR2C and suicidal behaviour is not widely studied; therefore, we might not find a

1 sufficient amount of reports to analyse; furthermore, we are focusing on five  
2 polymorphisms and perhaps there are not enough reports of each one. Secondly,  
3 the reports will be limited to English language journals, so the number of studies  
4 might be too small. High heterogeneity may also result due to differences in age,  
5 ethnicity, gender, education, wealth, etc. These limitations will decrease the  
6 statistical power of the study and reliability of our results.

7 Conversely, this will be the first meta-analysis exploring the link between the five  
8 SNPs of HTR2C and suicidal behaviour, specifically examining the allelic, additive,  
9 dominant, and recessive models. In addition, this study protocol could demonstrate  
10 the link between the 5-HTR2C gene and suicidal behaviour among the general  
11 population.

12 Performing an analysis by gender is a strong point; in theory, due to its  
13 chromosomal location (X chromosome), this gene must affect females and males  
14 differently. The results could help to determine if HTR2C is a risk factor in  
15 developing suicidal behaviour. Indirectly, our study could aid in understanding the  
16 aetiology of suicidal behaviour.

17  
18 **Ethics and dissemination:** This study will describe the association between  
19 HTR2C and suicidal behaviour. The results of this study will be reported in a peer-  
20 reviewed publication and in scientific presentations in Mexico and throughout the  
21 world.

22

1  
2  
3 **1 Author contributions:**  
4

5  
6 2 TZCA and GCTB conceived the study, participated in the design and helped to  
7  
8 3 draft the manuscript. GA, JRI and LNML helped on the selection of genes and  
9  
10 4 polymorphisms to study. TZCA, GCTB and A wrote the manuscript. All of the  
11  
12 5 authors read, critically revised and approved the final version of the manuscript.  
13  
14

15  
16 **6 Funding statement:**  
17

18  
19 7 This research received no specific grant from any funding agency.  
20  
21

22 **8 Competing interests statement:**  
23

24  
25 9 The authors declare not to have any competing interests.  
26  
27

28  
29 **10 Figure legends**  
30

31  
32 **11 Figure 1**  
33

34  
35 12 Distribution of association studies on the 5-HTR2C gene and suicidal behaviour  
36  
37 13 published in PubMed by year (figure adapted from the results of GoPubMed®).  
38  
39

40  
41 **14 Figure 2**  
42

43 15 Flow-chart for the search strategy and the inclusion/exclusion criteria used in the  
44  
45 16 meta-analysis and systematic review.  
46  
47

48  
49  
50  
51 **18 Figure 3**  
52

53  
54 19 World map of genetic association studies of the 5-HTR2C gene with suicidal  
55  
56 20 behaviour (figure adapted from the results of GoPubMed®).  
57  
58  
59  
60

1

2

### 3 References

- 4 1. Antypa N, Serretti A, Rujescu D. Serotonergic genes and suicide: a systematic review. *European*  
5 *neuropsychopharmacology : the journal of the European College of*  
6 *Neuropsychopharmacology* 2013;23:1125-42 doi:  
7 10.1016/j.euroneuro.2013.03.013published Online First: Epub Date]].
- 8 2. Pooley EC, Houston K, Hawton K, et al. Deliberate self-harm is associated with allelic variation in  
9 the tryptophan hydroxylase gene (TPH A779C), but not with polymorphisms in five other  
10 serotonergic genes. *Psychological medicine* 2003;33:775-83
- 11 3. Serretti A, Calati R, Giegling I, et al. Serotonin receptor HTR1A and HTR2C variants and  
12 personality traits in suicide attempters and controls. *Journal of psychiatric research*  
13 2009;43:519-25 doi: 10.1016/j.jpsychires.2008.06.005published Online First: Epub Date]].
- 14 4. Brzozowski FS, Soares GB, Benedet J, et al. Suicide time trends in Brazil from 1980 to 2005.  
15 *Cadernos de saude publica* 2010;26:1293-302
- 16 5. Jagodic HK, Agius M, Pregelj P. Inter-regional variations in suicide rates. *Psychiatria Danubina*  
17 2012;24 Suppl 1:S82-5
- 18 6. Varnik P. Suicide in the world. *International journal of environmental research and public health*  
19 2012;9:760-71 doi: 10.3390/ijerph9030760published Online First: Epub Date]].
- 20 7. Bani-Fatemi A, Polsinelli G, Kennedy JL, et al. Ethnicity and suicide attempt: analysis in bipolar  
21 disorder and schizophrenia. *BMC psychiatry* 2013;13:252 doi: 10.1186/1471-244x-13-  
22 252published Online First: Epub Date]].
- 23 8. Shinozaki G, Romanowicz M, Mrazek DA, et al. HTR2A gene-child abuse interaction and  
24 association with a history of suicide attempt among Caucasian depressed psychiatric  
25 inpatients. *Journal of affective disorders* 2013;150:1200-3 doi:  
26 10.1016/j.jad.2013.05.028published Online First: Epub Date]].
- 27 9. Choo C, Diederich J, Song I, et al. Cluster analysis reveals risk factors for repeated suicide  
28 attempts in a multi-ethnic Asian population. *Asian J Psychiatr* 2014;8:38-42 doi:  
29 10.1016/j.ajp.2013.10.001published Online First: Epub Date]].
- 30 10. Sadkowski M, Dennis B, Clayden RC, et al. The role of the serotonergic system in suicidal  
31 behavior. *Neuropsychiatric disease and treatment* 2013;9:1699-716 doi:  
32 10.2147/ndt.s50300published Online First: Epub Date]].
- 33 11. Tovilla-Zarate CA, Gonzalez-Castro TB, Juarez-Rojop I, et al. Study on genes of the serotonergic  
34 system and suicidal behavior: protocol for a case-control study in Mexican population.  
35 *BMC psychiatry* 2014;14:29 doi: 10.1186/1471-244x-14-29published Online First: Epub  
36 Date]].
- 37 12. Mandelli L, Serretti A. Gene environment interaction studies in depression and suicidal  
38 behavior: An update. *Neuroscience and biobehavioral reviews* 2013;37:2375-97 doi:  
39 10.1016/j.neubiorev.2013.07.011published Online First: Epub Date]].
- 40 13. Dracheva S, Patel N, Woo DA, et al. Increased serotonin 2C receptor mRNA editing: a possible  
41 risk factor for suicide. *Molecular psychiatry* 2008;13:1001-10 doi:  
42 10.1038/sj.mp.4002081published Online First: Epub Date]].
- 43 14. Serretti A, Mandelli L, Giegling I, et al. HTR2C and HTR1A gene variants in German and Italian  
44 suicide attempters and completers. *American journal of medical genetics. Part B,*

- 1  
2  
3 1 Neuropsychiatric genetics : the official publication of the International Society of  
4 2 Psychiatric Genetics 2007;144b:291-9 doi: 10.1002/ajmg.b.30432published Online First:  
5 3 Epub Date]].  
6 4  
7 4 15. Cavarec L, Vincent L, Le Borgne C, et al. In vitro screening for drug-induced depression and/or  
8 5 suicidal adverse effects: a new toxicogenomic assay based on CE-SSCP analysis of HTR2C  
9 6 mRNA editing in SH-SY5Y cells. Neurotoxicity research 2013;23:49-62 doi:  
10 7 10.1007/s12640-012-9324-9published Online First: Epub Date]].  
11 8  
12 8 16. Mann JJ. The serotonergic system in mood disorders and suicidal behaviour. Philosophical  
13 9 transactions of the Royal Society of London. Series B, Biological sciences  
14 10 2013;368:20120537 doi: 10.1098/rstb.2012.0537published Online First: Epub Date]].  
15 11  
16 12 17. Iwamoto K, Kato T. RNA editing of serotonin 2C receptor in human postmortem brains of major  
17 13 mental disorders. Neurosci Lett 2003;346:169-72  
18 14  
19 14 18. Castensson A, Aberg K, McCarthy S, et al. Serotonin receptor 2C (HTR2C) and schizophrenia:  
20 15 examination of possible medication and genetic influences on expression levels. American  
21 16 journal of medical genetics. Part B, Neuropsychiatric genetics : the official publication of  
22 17 the International Society of Psychiatric Genetics 2005;134b:84-9 doi:  
23 18 10.1002/ajmg.b.30151published Online First: Epub Date]].  
24 19  
25 20 19. Castensson A, Emilsson L, Sundberg R, et al. Decrease of serotonin receptor 2C in  
26 21 schizophrenia brains identified by high-resolution mRNA expression analysis. Biological  
27 22 psychiatry 2003;54:1212-21  
28 23  
29 23 20. Thompson A, Lavedan C, Volpi S. Absence of weight gain association with the HTR2C -759C/T  
30 24 polymorphism in patients with schizophrenia treated with iloperidone. Psychiatry research  
31 25 2010;175:271-3 doi: 10.1016/j.psychres.2009.03.020published Online First: Epub Date]].  
32 26  
33 26 21. Manchia M, Zai CC, Squassina A, Vincent JB, et al. Mixture regression analysis on age at onset  
34 27 in bipolar disorder patients: investigation of the role of serotonergic genes. European  
35 28 neuropsychopharmacology : the journal of the European College of  
36 29 Neuropsychopharmacology 2010;20:663-70 doi:  
37 30 10.1016/j.euroneuro.2010.04.001published Online First: Epub Date]].  
38 31  
39 32 22. Oruc L, Verheyen GR, Furac I, et al. Association analysis of the 5-HT2C receptor and 5-HT  
40 33 transporter genes in bipolar disorder. American journal of medical genetics 1997;74:504-6  
41 34  
42 31 23. Himei A, Kono Y, Yoneda H, et al. An association study between alcoholism and the  
43 32 serotonergic receptor genes. Alcoholism, clinical and experimental research 2000;24:341-2  
44 33  
45 34 24. Herman AI, Balogh KN. Polymorphisms of the serotonin transporter and receptor genes:  
46 35 susceptibility to substance abuse. Substance abuse and rehabilitation 2012;3:49-57 doi:  
47 36 10.2147/sar.s25864published Online First: Epub Date]].  
48 37  
49 37 25. Bortolato M, Pivac N, Muck Seler D, et al. The role of the serotonergic system at the interface  
50 38 of aggression and suicide. Neuroscience 2013;236:160-85 doi:  
51 39 10.1016/j.neuroscience.2013.01.015published Online First: Epub Date]].  
52 40  
53 39 26. De Luca V, Tharmaligam S, Strauss J, et al. 5-HT2C receptor and MAO-A interaction analysis: no  
54 41 association with suicidal behaviour in bipolar patients. European archives of psychiatry  
55 42 and clinical neuroscience 2008;258:428-33 doi: 10.1007/s00406-008-0815-xpublished  
56 43 Online First: Epub Date]].  
57 44  
58 43 27. Riva A, Kohane IS. A SNP-centric database for the investigation of the human genome. BMC  
59 45 bioinformatics 2004;5:33 doi: 10.1186/1471-2105-5-33published Online First: Epub  
60 46 Date]].  
47 46 28. Judy JT, Seifuddin F, Mahon PB, et al. Association study of serotonin pathway genes in  
attempted suicide. Am J Med Genet B Neuropsychiatr Genet 2012;1:112-9



- 1  
2  
3 1 29. Videtic A, Peternelj TT, Zupanc T, et al. Promoter and functional polymorphisms of HTR2C and  
4 2 suicide victims. *Genes Brain Behav* 2009;8:541-5  
5 3  
6 30. Zhang J, Shen Y, He G, et al. Lack of association between three serotonin genes and suicidal  
7 4 behavior in Chinese psychiatric patients. *Prog Neuropsychopharmacol Biol Psychiatry*  
8 5 2008;32:467-71  
9 6  
10 31. Turecki G, Sequeira A, Gingras Y, et al. Suicide and serotonin: study of variation at seven  
11 7 serotonin receptor genes in suicide completers. *Am J Med Genet B Neuropsychiatr Genet*  
12 8 2003;1:36-40  
13 9  
14 32. Stefulj J, Buttner A, Kubat M, et al. 5HT-2C receptor polymorphism in suicide victims.  
15 10 Association studies in German and Slavic populations. *Eur Arch Psychiatry Clin Neurosci*  
16 11 2004;254:224-7  
17 12  
18 33. Swartz MK. *The PRISMA statement: a guideline for systematic reviews and meta-analyses: J*  
19 13 *Pediatr Health Care*. 2011 Jan-Feb;25(1):1-2. doi: 10.1016/j.pedhc.2010.09.006.  
20 14  
21 34. Stang A. Critical evaluation of the Newcastle-Ottawa scale for the assessment of the quality of  
22 15 nonrandomized studies in meta-analyses. *Eur J Epidemiol* 2010;25:603-5  
23 16  
24 35. Gonzalez-Castro TB, Tovilla-Zarate C, Juarez-Rojop I, et al. Association of the 5HTR2A gene with  
25 17 suicidal behavior: case-control study and updated meta-analysis. *BMC Psychiatry*  
26 18 2013;13:13-25  
27 19  
28 36. Gonzalez-Castro TB, Tovilla-Zarate CA. Meta-analysis: A tool for clinical and experimental  
29 20 research in psychiatry. *Nord J Psychiatry* 2013;17:17  
30 21  
31 37. Gonzalez-Castro TB, Tovilla-Zarate CA, Juarez-Rojop I, et al. Association of 5HTR1A gene  
32 22 variants with suicidal behavior: case-control study and updated meta-analysis. *J Psychiatr*  
33 23 *Res* 2013;47:1665-72  
34 24  
35 38. Barrett JC, Fry B, Maller J, et al. Haploview: analysis and visualization of LD and haplotype  
36 25 maps. *Bioinformatics* 2005;21:263-5 doi: 10.1093/bioinformatics/bth457published Online  
37 26 First: Epub Date]].  
38 27  
39 39. Pandey GN. Biological basis of suicide and suicidal behavior. *Bipolar Disord* 2013;15:524-41  
40 28  
41  
42  
43  
44  
45  
46  
47  
48  
49  
50  
51  
52  
53  
54  
55  
56  
57  
58  
59  
60



1  
2  
3  
4  
5  
6  
7  
8  
9  
10  
11  
12  
13  
14  
15  
16  
17  
18  
19  
20  
21  
22  
23  
24  
25  
26  
27  
28  
29  
30  
31  
32  
33  
34  
35  
36  
37  
38  
39  
40  
41  
42  
43  
44  
45  
46  
47  
48  
49  
50  
51  
52  
53  
54  
55  
56  
57  
58  
59  
60

1

2

For peer review only

1  
2  
3  
4  
5  
6  
7  
8  
9  
10  
11  
12  
13  
14  
15  
16  
17  
18  
19  
20  
21  
22  
23  
24  
25  
26  
27  
28  
29  
30  
31  
32  
33  
34  
35  
36  
37  
38  
39  
40  
41  
42  
43  
44  
45  
46  
47  
48  
49  
50  
51  
52  
53  
54  
55  
56  
57  
58  
59  
60

1  
2  
3  
4  
5

**Association between HTR2C gene variants and suicidal behaviour: A  
protocol for the systematic review and meta-analysis of genetic studies.**

6 González-Castro Thelma Beatriz<sup>1</sup>, Juárez-Rojop Isela<sup>1</sup>, Genis Alma<sup>2</sup>, López-  
7 Narváez María Lilia<sup>3</sup>, Tovilla-Zárate Carlos Alfonso<sup>4</sup> \*

Formatted: English (U.K.)

8 <sup>1</sup>Universidad Juárez Autónoma de Tabasco, División Académica de Ciencias de la  
9 Salud, Villahermosa, Tabasco, México.

10 <sup>2</sup> Instituto Nacional de Medicina Genómica (INMEGEN), Servicios de Atención  
11 Psiquiátrica (SAP), Secretaría de Salud. México, D. F., México.

12 <sup>3</sup> Hospital General de Yajalón. Secretaria de Salud, Yajalón, Chiapas, México.

13 <sup>4</sup> Universidad Juárez Autónoma de Tabasco, División Académica Multidisciplinaria  
14 de Comalcalco, Comalcalco, Tabasco, México.

15  
16  
17  
18  
19  
20  
21  
22  
23  
24  
25  
26  
27  
28  
29  
30  
31  
32  
33  
34  
35  
36  
37  
38  
39  
40  
41  
42  
43  
44  
45  
46  
47  
48  
49  
50  
51  
52  
53  
54  
55  
56  
57  
58  
59  
60

17 Email addresses:

18 GCTB: [thelma.glez.castro@gmail.com](mailto:thelma.glez.castro@gmail.com)

19 JRI: [iselajua22@yahoo.com.mx](mailto:iselajua22@yahoo.com.mx)

20 GA: [genis76@yahoo.com](mailto:genis76@yahoo.com)

21 LNL: [dralialonar@yahoo.com.mx](mailto:dralialonar@yahoo.com.mx)

22 TZCA: [alfonso\\_tovillaz@yahoo.com.mx](mailto:alfonso_tovillaz@yahoo.com.mx)

23 \*Corresponding author

24  
25 *\*Correspondence to: Dr. Carlos Alfonso Tovilla Zárate, Universidad Juárez  
26 Autónoma de Tabasco, División Académica Multidisciplinaria de Comalcalco,  
27 Ranchería Sur, Cuarta Sección, C.P. 86650, Comalcalco, Tabasco, México. Tel.  
28 52 9933581500 ext. 6901, e-mail: [alfonso\\_tovillaz@yahoo.com.mx](mailto:alfonso_tovillaz@yahoo.com.mx)*

## Abstract

**Introduction:** Suicide is an important public health problem and one of the most common causes of death throughout the world. Suicidal behaviour is complex, and its causes are multi-factorial. Case-control studies have reported an association between an alteration of the serotonin system and suicidal behaviour. Recently, it has been suggested that the 5-HT<sub>2C</sub> serotonin receptor gene has been suggested to be involved in its pathogenesis of suicidal behaviour.

**Methods and analysis:** To evaluate the role of the 5-HT<sub>2C</sub> gene in suicidal behaviour, we will perform a systematic review and a meta-analysis of world-wide reports that have investigated this association between the serotonin system and suicidal behaviour. This analysis will be reported following the Preferred Reporting Items for Systematic Reviews and Meta-Analyses (PRISMA) criteria. Studies deemed for inclusion in the systematic review will be scored for methodological quality using the Newcastle-Ottawa Assessment Scale (NOS). The inclusion criteria will be to present independent data, must be case-control studies, and to be published in journal peer-reviews. To generate more accurate analyses, we will grade the reports using the GRADES scale procedures.

**Ethics and dissemination:** This study will describe the association between the HTR<sub>2C</sub> gene and suicidal behaviour. The results will be disseminated by reported in a peer-reviewed publication and in scientific presentations in Mexico and throughout the world.

**Protocol registration:** PROSPERO CRD42014009213

**Comment [Ed1]:** Perhaps "multi-faceted" would work better here.

**Formatted:** English (U.K.), Check spelling and grammar

1  
2  
3  
4  
5  
6  
7  
8  
9  
10  
11  
12  
13  
14  
15  
16  
17  
18  
19  
20  
21  
22  
23  
24  
25  
26  
27  
28  
29  
30  
31  
32  
33  
34  
35  
36  
37  
38  
39  
40  
41  
42  
43  
44  
45  
46  
47  
48  
49  
50  
51  
52  
53  
54  
55  
56  
57  
58  
59  
60

1  
2  
3  
4  
5  
6  
7  
8  
9  
10  
11  
12  
13  
14  
15

### Strengths and limitations of the study

- The results could improve the understanding of the genetic component of suicidal behaviour.
- This study could show evidence of an association between the 5-HTR2C gene and suicidal behaviour.
- We will perform an analysis by gender that could determine if the 5-HTR2C gene affects females and males differently.
- A small amount-number of reports (and therefore a small sample size) is a possible limitation.
- High heterogeneity among the reports could be a limitation.

Formatted: English (U.K.), Check spelling and grammar

## Introduction

Suicide is the act of taking one's own life voluntarily and intentionally. Suicidal behaviour (SB) includes a wide spectrum of self-destructive actions that can be classified as: 1) suicidal ideation (thoughts of ending one's own life, including planning a specific method to succeed), 2) attempted suicide or parasuicide (when an individual deliberately hurts himself but the act does not result in death) and 3) completed suicide (when the action ends the life of the person who carries it out).<sup>1-3</sup>

Suicide is a worldwide problem, and ~~it~~ ~~its prevalence is~~ ~~has been~~ increasing through over time.<sup>4-6</sup> Social factors alone can not fully explain the suicidal behaviour.<sup>7-9</sup> Furthermore, some studies have found that there is a potential genetic component ~~in it~~ ~~linked to suicidal behaviour~~.<sup>1,10</sup>

The genetic studies that have tried to identify genes that predispose certain individuals to suicidal behaviour, have focused on genes that codify the proteins involved in the serotonergic system, ~~since because~~ this system interferes ~~in with~~ the control of mood, emotions, aggression and anxiety, ~~all of this again which~~ could influence suicidal behaviour.<sup>11-13</sup> Recently, ~~it has been proposed that~~ the 5-HTT2C gene ~~has been proposed to be~~ related to suicidal behaviour.<sup>10,14-17</sup> due to its association with other mental diseases such as schizophrenia,<sup>18-20</sup> bipolar disorder,<sup>21,22</sup> alcoholism,<sup>23</sup> and substance abuse.<sup>24</sup> Furthermore, the 5-HTT2C gene has been associated with anxiety, mood disorders and impulsiveness, and these are important suicide risk factors.<sup>16,25</sup>

Formatted: English (U.K.), Check spelling and grammar

Formatted: English (U.K.), Check spelling and grammar

Formatted: English (U.K.), Check spelling and grammar

Formatted: English (U.K.), Check spelling and grammar

1 ~~The~~ HTR2C (the 5-HTR2C gene) is a serotonin 2C receptor that lies on the X  
 2 chromosome on the, long arm at, position Xq24-q28. ~~It~~ HTR2C has five introns  
 3 and six exons, and so far, it is the only G-protein binding receptor known to  
 4 undergo alternative splicing of the mRNA, therefore to have resulting in more  
 5 protein isoforms.<sup>26</sup> ~~It~~ HTR2C has a vast number of single nucleotide  
 6 polymorphisms (SNPs). More of than 1000 polymorphism have been identified  
 7 along the gene (according to snpper.chip.org, October 2, 2013).<sup>27</sup> To date, the  
 8 association between ~~the~~ HTR2C and suicidal behaviour ur remains controversial  
 9 since because the reports include both positive and negative findings.<sup>28-32</sup> ~~F~~ The  
 10 figure 1 shows the distribution of HTR2C and suicide studies over time.  
 11 Consequently, it is important to perform a deeper study assessing the possible  
 12 connection between the 5-HTR2C gene and suicidal behaviour ur.

### 14 Aims and objectives

15 This study aims to systematically review and ~~meta-analyze~~ perform a meta-analysis  
 16 on the world-wide reports that have ~~researched for~~ investigated an association  
 17 between the serotonin 2C receptor gene (5-HTR2C) and suicidal behaviour ur.  
 18 Particularly, it aims to focus on rs547536, rs2192372, rs4272555, rs24287207 and  
 19 rs6318 polymorphisms in order to detect which ones act as a possible risk factors s.

### 21 Methods/analysis

### 22 Systematic Review and Meta-analysis

**Comment [Ed2]:** Please ensure that this edit maintains your intended meaning.

**Formatted:** English (U.K.), Check spelling and grammar

**Formatted:** English (U.K.), Check spelling and grammar

**Formatted:** English (U.K.), Check spelling and grammar

1 This meta-analysis will be reported following the Preferred Reporting Items for  
2 Systematic Reviews and Meta-Analyses (PRISMA) criteria.<sup>33</sup>

### 3 Identification and selection of publications

4 For both, the systematic review and the meta-analysis, the literature will be  
5 searched from three databases: PubMed, Web of Science and EBSCO  
6 EBSCO—using the following keywords: “HTR2C and suicidal behaviour” and  
7 “HTR2C and suicide”. These words will be combined to retrieve the summaries.

8 The selected publications selected will meet the following criteria: (1) to be  
9 published in peer-reviewed journals, (2) to contain independent data, (3) to be  
10 case-control association studies in which the frequencies of the three genotypes  
11 are clearly stated or could be calculated, (4) the use of healthy individuals or  
12 psychiatric patients without suicidal behaviour as controls; (5) to include one or  
13 more of the three forms of suicidal behaviour (suicidal ideation, attempted suicide  
14 or completed suicide); and (6) to be written in English. The procedure planned  
15 procedure is exemplified-illustrated on-in figure-Figure 2.

16 To determine inclusion, two researchers (González-Castro and Juárez-Rojop) will  
17 work independently to screening each of the titles, abstracts and full texts. When  
18 the researchers disagree a third researcher (Tovilla-Zárate) will be consulted.

### 20 Data extraction

21 For the systematic review, the following data will be searched and

1 | ~~analyzed~~analysed: authors, year of publication, region, sample size, number of  
2 | cases and controls, gender, age, psychiatric diagnosis, ethnical origin and finally,  
3 | genotype and allele frequencies. The SNPs in the study will be rs547536,  
4 | rs2192372, rs4272555, rs24287207 and rs6318.

5 | The meta-analysis will be constructed following four categories: (a) exposed sick,  
6 | (b) exposed not-sick, (c) not-exposed sick and (d) not- exposed not-sick. The term  
7 | “sick” ~~term~~ refers to subjects exhibiting suicidal behaviour and the term “exposed”  
8 | refers term to the allele of risk.

9 | The data extraction will be performed by González-Castro, Juárez-Rojop, Genis-  
10 | Mendoza and López-Nárvaez.

### 11 | **Data analysis**

12 | The systematic review ~~would~~will be presented ~~on~~in tables comparing quality  
13 | measurements and the data previously mentioned. Studies deemed for inclusion  
14 | will be scored for methodological quality using the Newcastle-Ottawa Assessment  
15 | Scale (NOS).<sup>34</sup> A score of six will be considered ~~as~~ the cut-off point to distinguish  
16 | higher from lower quality studies. To give more support to our analysis, we will  
17 | consider the GRADES scale procedures (<http://www.gradeworkinggroup.org>).

18 | For the meta-analysis, we will use the EPIDAT 3.1 program (Software for  
19 | Epidemiologic Analysis of Tabulated Data, Version 3.1, Pan American Health  
20 | Organization; <http://dxsp.sergas.es>); this software is freely available for the  
21 | epidemiologic analysis of tabulated data. Data will be ~~analyzed~~analysed using the  
22 | random-effects model following the reports in the literature.<sup>35-37</sup> The sample

Formatted: English (U.K.), Check spelling and grammar

Formatted: English (U.K.), Check spelling and grammar



1  
2  
3  
4  
5  
6  
7  
8  
9  
10  
11  
12  
13  
14  
15  
16  
17  
18  
19  
20  
21  
22  
23  
24  
25  
26  
27  
28  
29  
30  
31  
32  
33  
34  
35  
36  
37  
38  
39  
40  
41  
42  
43  
44  
45  
46  
47  
48  
49  
50  
51  
52  
53  
54  
55  
56  
57  
58  
59  
60

1 | heterogeneity will be measured ~~with-using~~ the Dersimonian and Laird's Q test; we  
2 | will also use graphs to help ~~visualize—visualise~~ those studies favouring  
3 | heterogeneity. The results of the meta-analysis will be expressed as odds ratios  
4 | (ORs). Pooled ORs will be calculated for each model ~~used~~; viz.: allelic (Example:  
5 | A vs. C), additive (AA vs. CC), dominant (AA + AC vs. CC), and recessive (AA vs.  
6 | AC + CC). ~~Since-Because~~ the HTR2C ~~gene~~ is located on the X chromosome, an  
7 | analysis by gender will be performed. To address the publication bias, the Egger's  
8 | test and funnel plots will be calculated with the EPIDAT 3.1 software. This plotting  
9 | will standardize the effect of each study on the vertical axis and its correspondent  
10 | precision on the horizontal axis. Sensibility analysis will be performed. The  
11 | influence of each study in the global estimation will be ~~analyzed—analysed~~ and  
12 | graphed. The direction of the effect will be ~~analyzedanalysed~~. To evaluate  
13 | genotype distribution and calculate the Hardy-Weinberg equilibrium, we will use a  
14 | chi-squared ( $\chi^2$ ) analysis. Regarding the presence of Hardy-Weinberg equilibrium,  
15 | we will use the Pearson's chi-squared test to assess goodness of fit. Finally, the  
16 | Haploview 4.2 <sup>38</sup> will be used to calculate the linkage disequilibrium (LD) of the  
17 | markers.

**Comment [Ed3]:** Please ensure that this edit maintains your meaning.

**Formatted:** English (U.K.), Check spelling and grammar

18 | The ~~analyzed—analysed~~ of dates will be performed by Gonzalez-Castro and Tovilla-  
19 | Zarate- ~~Any d~~Differences in the interpretation ~~could—will~~ be resolved by López-  
20 | Narvaez.

## 22 | Discussion

1 Suicide is a public health problem that affects entire communities and not ~~only-just~~  
 2 the suicidal person. The medical costs and lost wages associated with suicide also  
 3 take their toll on the community. Therefore, it is crucial to better understand the  
 4 ~~etiology~~~~aetiology~~ of suicidal behaviour~~ur~~, as well as ~~knowing-define~~ how ~~big- large~~  
 5 the problem is and whom it affects.

6 ~~The~~ literature suggests that there could be a genetic factor linked to suicide.  
 7 Some studies have proposed a hypothetical explanation using the Stress-Diathesis  
 8 Model and have observed that people who ~~have-had~~~~exhibit~~ suicidal behaviour~~ur~~ are  
 9 more likely to have a family history of suicide.<sup>16</sup> Therefore, ~~we can~~~~this finding~~  
 10 ~~suggests~~ that a genetic component could contribute to suicidal tendencies.<sup>16</sup> The  
 11 serotonin neurotransmission system has received the most consideration as ~~the~~  
 12 candidate genes ~~linked to~~ suicidal behaviour ~~because~~~~since~~ the serotonin system  
 13 regulates mood, impulsiveness and anxiety, which are important suicide risk  
 14 factors. Furthermore, the serotonergic function is clearly altered in suicide  
 15 victims.<sup>10</sup> Among the most studied genes, are the ones that codify ~~to the~~  
 16 tryptophan hydroxylase 1 and 2 (TPH-1 and TPH-2), ~~the~~ serotonin transporter (5-  
 17 HTT or SLC6A4) and the serotonin receptors (5-HTR1A, 5-HTR1B, 5-HTR2A, 5-  
 18 HTR2C, etc.).<sup>39</sup> ~~Figure 3 summarizes the worldwide studies linking suicidal~~  
 19 ~~behaviour with HTR2C, Being the gene last most recently one the most~~  
 20 ~~recently highlighted in the literature in association with suicidal behaviour suggested~~  
 21 ~~around the world to be associated with suicidal behavior Figure 3.~~ The ~~gene~~ 5-  
 22 HTR2C ~~gene needs-requires~~ a deeper analysis; therefore, by ~~p~~Performing a  
 23 systematic review and a meta-analysis, this protocol could improve the

**Formatted:** English (U.K.), Check spelling and grammar

**Comment [Ed4]:** Please ensure that your meaning has been maintained in this edit.

**Formatted:** English (U.K.), Check spelling and grammar

**Formatted:** English (U.K.), Check spelling and grammar

**Formatted:** English (U.K.), Check spelling and grammar

**Formatted:** English (U.K.), Highlight

**Comment [Ed5]:** Please ensure that this edit maintains your meaning.

1 understanding of the genetic component in suicidal behaviour. ~~Regarding the~~  
 2 data analysis, we will adopt the random effects model, because it accounts for  
 3 additional sources of inter-study variation when heterogeneity exists and, ~~thus,~~  
 4 a more reliable outcome.

5 This meta-analysis could present some limitations. First, the association between  
 6 HTR2C and suicidal behaviour is not widely studied; therefore, we might not find a  
 7 sufficient amount of reports to ~~analyze~~analyse; furthermore, we are focusing on  
 8 five polymorphisms and perhaps there are not enough reports of each one.  
 9 Secondly, the reports will be limited to English language journals, so the number of  
 10 studies might be too small. High heterogeneity ~~may also result,~~ due to differences  
 11 in age, ethnicity, gender, education, wealth, etc. These limitations will decrease the  
 12 statistical power of the study ~~and~~ reliability of our results.

13 ~~Conversely, it—this would—will be the first meta-analysis associating~~  
 14 ~~between exploring the link between the~~ five SNPs of HTR2C and suicidal  
 15 behaviour, ~~specifically examining the with~~ allelic, additive, dominant, and recessive  
 16 models. ~~In addition, this study protocol could demonstrate the link between the 5-~~  
 17 HTR2C ~~gene in the~~and suicidal behaviour ~~of among~~ the general population.

18 Performing an analysis by gender is a strong point; in theory, due to its  
 19 chromosomal location (X chromosome), this gene must affect females and males  
 20 differently. The results could help to determine if ~~the~~HTR2C ~~gene~~ is a risk factor in  
 21 developing suicidal behaviour. Indirectly, our study could ~~help to aid in~~  
 22 understanding the ~~etiologyaetiology~~ of suicidal behaviour.

Formatted: Font: Not Italic, English (U.K.)

Formatted: Font: Not Italic

Comment [Ed6]: Please ensure that this edit maintains your intended meaning.

1  
2  
3  
4  
5  
6  
7  
8  
9  
10  
11  
12  
13  
14  
15  
16  
17  
18  
19  
20  
21  
22  
23  
24  
25  
26  
27  
28  
29  
30  
31  
32  
33  
34  
35  
36  
37  
38  
39  
40  
41  
42  
43  
44  
45  
46  
47  
48  
49  
50  
51  
52  
53  
54  
55  
56  
57  
58  
59  
60

1  
2  
3  
4  
5  
6  
7  
8

**Ethics and dissemination:** This study will describe the association between HTR2C gene and suicidal behavior. The results of this study will be disseminated reported in by a peer-reviewed publication and in scientific presentations in Mexico and throughout the world.

## References

1. Antypa N, Serretti A, Rujescu D. Serotonergic genes and suicide: a systematic review. *European neuropsychopharmacology : the journal of the European College of Neuropsychopharmacology* 2013;23:1125-42 doi: 10.1016/j.euroneuro.2013.03.013published Online First: Epub Date].
2. Pooley EC, Houston K, Hawton K, Harrison PJ. Deliberate self-harm is associated with allelic variation in the tryptophan hydroxylase gene (TPH A779C), but not with polymorphisms in five other serotonergic genes. *Psychological medicine* 2003;33:775-83
3. Serretti A, Calati R, Giegling I, Hartmann AM, Moller HJ, Rujescu D. Serotonin receptor HTR1A and HTR2C variants and personality traits in suicide attempters and controls. *Journal of psychiatric research* 2009;43:519-25 doi: 10.1016/j.jpsychires.2008.06.005published Online First: Epub Date].
4. Brzozowski FS, Soares GB, Benedet J, Boing AF, Peres MA. Suicide time trends in Brazil from 1980 to 2005. *Cadernos de saude publica* 2010;26:1293-302
5. Jagodic HK, Agius M, Pregelj P. Inter-regional variations in suicide rates. *Psychiatria Danubina* 2012;24 Suppl 1:S82-5
6. Varnik P. Suicide in the world. *International journal of environmental research and public health* 2012;9:760-71 doi: 10.3390/ijerph9030760published Online First: Epub Date].
7. Bani-Fatemi A, Polsinelli G, Kennedy JL, De Luca V. Ethnicity and suicide attempt: analysis in bipolar disorder and schizophrenia. *BMC psychiatry* 2013;13:252 doi: 10.1186/1471-244x-13-252published Online First: Epub Date].
8. Shinozaki G, Romanowicz M, Mrazek DA, Kung S. HTR2A gene-child abuse interaction and association with a history of suicide attempt among Caucasian depressed psychiatric inpatients. *Journal of affective disorders* 2013;150:1200-3 doi: 10.1016/j.jad.2013.05.028published Online First: Epub Date].
9. Choo C, Diederich J, Song I, Ho R. Cluster analysis reveals risk factors for repeated suicide attempts in a multi-ethnic Asian population. *Asian J Psychiatr* 2014;8:38-42 doi: 10.1016/j.ajp.2013.10.001published Online First: Epub Date].
10. Sadkowski M, Dennis B, Clayden RC, et al. The role of the serotonergic system in suicidal behavior. *Neuropsychiatric disease and treatment* 2013;9:1699-716 doi: 10.2147/ndt.s50300published Online First: Epub Date].

1  
2  
3  
4  
5  
6  
7  
8  
9  
10  
11  
12  
13  
14  
15  
16  
17  
18  
19  
20  
21  
22  
23  
24  
25  
26  
27  
28  
29  
30  
31  
32  
33  
34  
35  
36  
37  
38  
39  
40  
41  
42  
43  
44  
45  
46  
47  
48  
49  
50  
51  
52  
53  
54  
55  
56  
57  
58  
59  
60

11. Tovilla-Zarate CA, Gonzalez-Castro TB, Juarez-Rojop I, et al. Study on genes of the serotonergic system and suicidal behavior: protocol for a case-control study in Mexican population. *BMC psychiatry* 2014;14:29 doi: 10.1186/1471-244x-14-29published Online First: Epub Date]].
12. Mandelli L, Serretti A. Gene environment interaction studies in depression and suicidal behavior: An update. *Neuroscience and biobehavioral reviews* 2013;37:2375-97 doi: 10.1016/j.neubiorev.2013.07.011published Online First: Epub Date]].
13. Dracheva S, Patel N, Woo DA, Marcus SM, Siever LJ, Haroutunian V. Increased serotonin 2C receptor mRNA editing: a possible risk factor for suicide. *Molecular psychiatry* 2008;13:1001-10 doi: 10.1038/sj.mp.4002081published Online First: Epub Date]].
14. Serretti A, Mandelli L, Giegling I, et al. HTR2C and HTR1A gene variants in German and Italian suicide attempters and completers. *American journal of medical genetics. Part B, Neuropsychiatric genetics : the official publication of the International Society of Psychiatric Genetics* 2007;144b:291-9 doi: 10.1002/ajmg.b.30432published Online First: Epub Date]].
15. Cavarec L, Vincent L, Le Borgne C, et al. In vitro screening for drug-induced depression and/or suicidal adverse effects: a new toxicogenomic assay based on CE-SSCP analysis of HTR2C mRNA editing in SH-SY5Y cells. *Neurotoxicity research* 2013;23:49-62 doi: 10.1007/s12640-012-9324-9published Online First: Epub Date]].
16. Mann JJ. The serotonergic system in mood disorders and suicidal behaviour. *Philosophical transactions of the Royal Society of London. Series B, Biological sciences* 2013;368:20120537 doi: 10.1098/rstb.2012.0537published Online First: Epub Date]].
17. Iwamoto K, Kato T. RNA editing of serotonin 2C receptor in human postmortem brains of major mental disorders. *Neurosci Lett* 2003;346:169-72
18. Castensson A, Aberg K, McCarthy S, Saetre P, Andersson B, Jazin E. Serotonin receptor 2C (HTR2C) and schizophrenia: examination of possible medication and genetic influences on expression levels. *American journal of medical genetics. Part B, Neuropsychiatric genetics : the official publication of the International Society of Psychiatric Genetics* 2005;134b:84-9 doi: 10.1002/ajmg.b.30151published Online First: Epub Date]].
19. Castensson A, Emilsson L, Sundberg R, Jazin E. Decrease of serotonin receptor 2C in schizophrenia brains identified by high-resolution mRNA expression analysis. *Biological psychiatry* 2003;54:1212-21
20. Thompson A, Lavedan C, Volpi S. Absence of weight gain association with the HTR2C -759C/T polymorphism in patients with schizophrenia treated with iloperidone. *Psychiatry research* 2010;175:271-3 doi: 10.1016/j.psychres.2009.03.020published Online First: Epub Date]].
21. Manchia M, Zai CC, Squassina A, Vincent JB, De Luca V, Kennedy JL. Mixture regression analysis on age at onset in bipolar disorder patients: investigation of the role of serotonergic genes. *European neuropsychopharmacology : the journal of the European College of Neuropsychopharmacology* 2010;20:663-70 doi: 10.1016/j.euroneuro.2010.04.001published Online First: Epub Date]].
22. Oruc L, Verheyen GR, Furac I, et al. Association analysis of the 5-HT2C receptor and 5-HT transporter genes in bipolar disorder. *American journal of medical genetics* 1997;74:504-6
23. Himei A, Kono Y, Yoneda H, et al. An association study between alcoholism and the serotonergic receptor genes. *Alcoholism, clinical and experimental research* 2000;24:341-2
24. Herman AI, Balogh KN. Polymorphisms of the serotonin transporter and receptor genes: susceptibility to substance abuse. *Substance abuse and rehabilitation* 2012;3:49-57 doi: 10.2147/sar.s25864published Online First: Epub Date]].

- 1  
2  
3  
4  
5  
6  
7  
8  
9 1 25. Bortolato M, Pivac N, Muck Seler D, Nikolac Perkovic M, Pessia M, Di Giovanni G. The role of  
10 2 the serotonergic system at the interface of aggression and suicide. *Neuroscience*  
11 3 2013;236:160-85 doi: 10.1016/j.neuroscience.2013.01.015published Online First: Epub  
12 4 Date]].
- 13 5 26. De Luca V, Tharmaligam S, Strauss J, Kennedy JL. 5-HT2C receptor and MAO-A interaction  
14 6 analysis: no association with suicidal behaviour in bipolar patients. *European archives of*  
15 7 *psychiatry and clinical neuroscience* 2008;258:428-33 doi: 10.1007/s00406-008-0815-  
16 8 xpublished Online First: Epub Date]].
- 17 9 27. Riva A, Kohane IS. A SNP-centric database for the investigation of the human genome. *BMC*  
18 10 *bioinformatics* 2004;5:33 doi: 10.1186/1471-2105-5-33published Online First: Epub  
19 11 Date]].
- 20 12 28. Judy JT, Seifuddin F, Mahon PB, et al. Association study of serotonin pathway genes in  
21 13 attempted suicide. *Am J Med Genet B Neuropsychiatr Genet* 2012;1:112-9
- 22 14 29. Videtic A, Peternelj TT, Zupanc T, Balazic J, Komel R. Promoter and functional polymorphisms  
23 15 of HTR2C and suicide victims. *Genes Brain Behav* 2009;8:541-5
- 24 16 30. Zhang J, Shen Y, He G, et al. Lack of association between three serotonin genes and suicidal  
25 17 behavior in Chinese psychiatric patients. *Prog Neuropsychopharmacol Biol Psychiatry*  
26 18 2008;32:467-71
- 27 19 31. Turecki G, Sequeira A, Gingras Y, et al. Suicide and serotonin: study of variation at seven  
28 20 serotonin receptor genes in suicide completers. *Am J Med Genet B Neuropsychiatr Genet*  
29 21 2003;1:36-40
- 30 22 32. Stefulj J, Buttner A, Kubat M, et al. 5HT-2C receptor polymorphism in suicide victims.  
31 23 Association studies in German and Slavic populations. *Eur Arch Psychiatry Clin Neurosci*  
32 24 2004;254:224-7
- 33 25 33. Swartz MK. *The PRISMA statement: a guideline for systematic reviews and meta-analyses: J*  
34 26 *Pediatr Health Care*. 2011 Jan-Feb;25(1):1-2. doi: 10.1016/j.pedhc.2010.09.006.
- 35 27 34. Stang A. Critical evaluation of the Newcastle-Ottawa scale for the assessment of the quality of  
36 28 nonrandomized studies in meta-analyses. *Eur J Epidemiol* 2010;25:603-5
- 37 29 35. Gonzalez-Castro TB, Tovilla-Zarate C, Juarez-Rojop I, et al. Association of the 5HTR2A gene with  
38 30 suicidal behavior: case-control study and updated meta-analysis. *BMC Psychiatry*  
39 31 2013;13:13-25
- 40 32 36. Gonzalez-Castro TB, Tovilla-Zarate CA. Meta-analysis: A tool for clinical and experimental  
41 33 research in psychiatry. *Nord J Psychiatry* 2013;17:17
- 42 34 37. Gonzalez-Castro TB, Tovilla-Zarate CA, Juarez-Rojop I, et al. Association of 5HTR1A gene  
43 35 variants with suicidal behavior: case-control study and updated meta-analysis. *J Psychiatr*  
44 36 *Res* 2013;47:1665-72
- 45 37 38. Barrett JC, Fry B, Maller J, Daly MJ. Haploview: analysis and visualization of LD and haplotype  
46 38 maps. *Bioinformatics* 2005;21:263-5 doi: 10.1093/bioinformatics/bth457published Online  
47 39 First: Epub Date]].
- 48 40 39. Pandey GN. Biological basis of suicide and suicidal behavior. *Bipolar Disord* 2013;15:524-41

1  
2  
3  
4  
5  
6  
7  
8  
9  
10  
11  
12  
13  
14  
15  
16  
17  
18  
19  
20  
21  
22  
23  
24  
25  
26  
27  
28  
29  
30  
31  
32  
33  
34  
35  
36  
37  
38  
39  
40  
41  
42  
43  
44  
45  
46  
47  
48  
49  
50  
51  
52  
53  
54  
55  
56  
57  
58  
59  
60

1

2 | **Author's contributions:**

3 | TZCA and GCTB conceived the study, participated in the design and helped to  
4 | draft the manuscript. GA, JRI and LNML helped on the selection of genes and  
5 | polymorphisms to study. TZCA, GCTB and A wrote the manuscript. All [of the](#)  
6 | authors read, critically revised and approved the final version of the manuscript.

7

8 | **Funding statement:**

9 | This research received no specific grant from any funding [agency](#).

10 | **Competing interests statement:**

11 | The authors declare not to have any competing interests.

12

1  
2  
3  
4  
5  
6  
7  
8  
9  
10 **Figure legends**  
11

12  
13 Figure 1

14  
15  
16 Distribution of association studies on the 5-HTR2C gene and suicidal behaviour  
17 published in PubMed by year ~~(f~~Figure adapted from the results of GoPubMed®).  
18

19  
20 ~~Figure 2-~~

21  
22 Flow-chart for the search strategy and the inclusion/exclusion criteria ~~to be~~ used in  
23 the meta-analysis and systematic review.  
24  
25  
26  
27

28  
29 Figure 3

30  
31 World map of ~~Genetic-genetic~~ association studies of the 5-HTR2C gene with  
32 suicidal behaviour ~~(f~~Figure adapted from the results of GoPubMed®).  
33  
34  
35  
36  
37  
38  
39  
40  
41  
42  
43  
44  
45  
46  
47  
48  
49  
50  
51  
52  
53  
54  
55  
56  
57  
58  
59  
60

Formatted: Font: Not Bold, English (U.K.)



1  
2  
3  
4  
5  
6  
7  
8  
9  
10  
11  
12  
13  
14  
15  
16  
17  
18  
19  
20  
21  
22  
23  
24  
25  
26  
27  
28  
29  
30  
31  
32  
33  
34  
35  
36  
37  
38  
39  
40  
41  
42  
43  
44  
45  
46  
47  
48  
49  
50  
51  
52  
53  
54  
55  
56  
57  
58  
59  
60



Distribution of association studies on the 5-HTR2C gene and suicidal behaviour published in PubMed by year (figure adapted from the results of GoPubMed®).  
202x110mm (300 x 300 DPI)

review only



Flow-chart for the search strategy and the inclusion/exclusion criteria used in the meta-analysis and systematic review.  
93x97mm (300 x 300 DPI)



1  
2  
3  
4  
5  
6  
7  
8  
9  
10  
11  
12  
13  
14  
15  
16  
17  
18  
19  
20  
21  
22  
23  
24  
25  
26  
27  
28  
29  
30  
31  
32  
33  
34  
35  
36  
37  
38  
39  
40  
41  
42  
43  
44  
45  
46  
47  
48  
49  
50  
51  
52  
53  
54  
55  
56  
57  
58  
59  
60

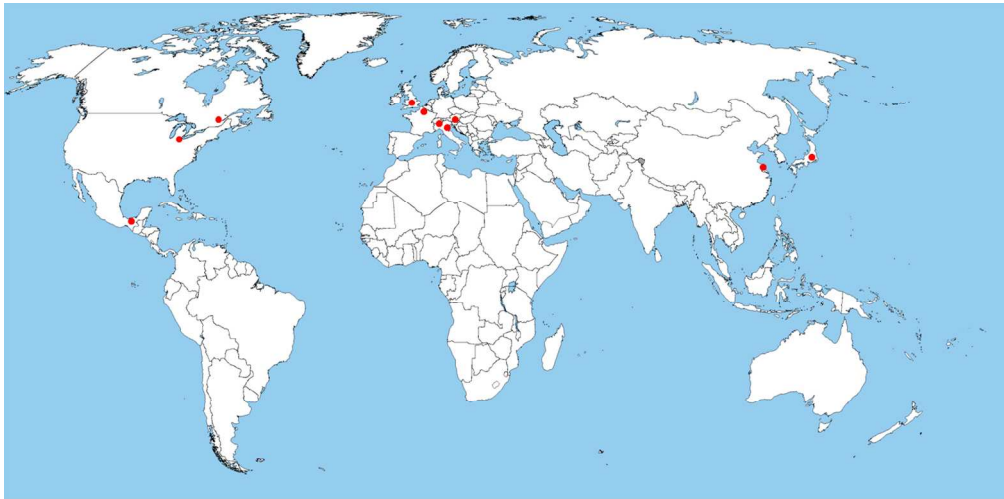

World map of genetic association studies of the 5-HTT2C gene with suicidal behaviour (figure adapted from the results of GoPubMed®).

er review only
